# Supplementary material for: Synthesis and Evaluation of a Fluorine-18 Radioligand for Imaging Huntingtin Aggregates by Positron Emission Tomographic Imaging
Source: PubMed Central journal article supplement (PMC8675899; doi:10.3389/fnins.2021.766176), 2021-12-02
Supplement: Data_Sheet_1.pdf [file Data_Sheet_1.pdf]

## Supplementary Material

# Synthesis and Evaluation of a Fluorine-18 Radioligand for Imaging Huntingtin Aggregates by Positron Emission Tomographic Imaging

### Table of Contents

|                                                                                                                                                       |     |
|-------------------------------------------------------------------------------------------------------------------------------------------------------|-----|
| 1. Radiochemistry.....                                                                                                                                | S2  |
| 2. Preclinical Experiments.....                                                                                                                       | S7  |
| 2.1 Saturation binding curves .....                                                                                                                   | S7  |
| 2.2 Representative autoradiography images.....                                                                                                        | S9  |
| 3. <sup>1</sup> H NMR, <sup>13</sup> C NMR and HRMS Spectra.....                                                                                      | S10 |
| 6.1. (5-(2,2,2-Trifluoroethoxy)pyridin-2-yl)methanol ( <b>3</b> )                                                                                     |     |
| 6.2. 2-Methyl-5-((5-(2,2,2-trifluoroethoxy)pyridin-2-yl)methoxy)benzo[ <i>d</i> ]oxazole ( <b>5</b> )                                                 |     |
| 6.3. 2-Amino-4-((5-(2,2,2-trifluoroethoxy)pyridin-2-yl)methoxy)phenol ( <b>7</b> )                                                                    |     |
| 6.4. <i>N</i> -(2-Hydroxy-5-((5-(2,2,2-trifluoroethoxy)pyridin-2-yl)methoxy)phenyl)-1-methyl-6-oxo-1,6-dihydropyridazine-3-carboxamide ( <b>9</b> )   |     |
| 6.5. 2-Methyl-6-(5-((5-(2,2,2-trifluoroethoxy)pyridin-2-yl)methoxy)benzo[ <i>d</i> ]oxazol-2-yl)pyridazine 3( <i>2H</i> )-one ( <b>1</b> )            |     |
| 6.6. (5-((2,2-Difluorovinyl)oxy)pyridin-2-yl)methanol ( <b>4</b> )                                                                                    |     |
| 6.7. 5-((5-((2,2-Difluorovinyl)oxy)pyridin-2-yl)methoxy)-2-methylbenzo[ <i>d</i> ]oxazole ( <b>6</b> )                                                |     |
| 6.8. 2-Amino-4-((5-((2,2-difluorovinyl)oxy)pyridin-2-yl)methoxy)phenol ( <b>8</b> )                                                                   |     |
| 6.9. <i>N</i> -(5-((5-((2,2-Difluorovinyl)oxy)pyridin-2-yl)methoxy)-2-hydroxyphenyl)-1-methyl-6-oxo-1,6-dihydropyridazine-3-carboxamide ( <b>10</b> ) |     |
| 6.10. 6-(5-((5-((2,2-Difluorovinyl)oxy)pyridin-2-yl)methoxy)benzo[ <i>d</i> ]oxazol-2-yl)-2-methylpyridazine-3( <i>2H</i> )-one ( <b>11</b> )         |     |

## 1. Radiochemistry

### 6-(5-((5-(2,2-Difluoro-2-(fluoro- $^{18}\text{F}$ )ethoxy)pyridin-2-yl)methoxy)benzo[*d*]oxazol-2-yl)-2-methylpyridazin-3(2*H*)-one [ $^{18}\text{F}$ ]1:

[ $^{18}\text{F}$ ]1 was synthesized as described in the main manuscript using a TRACERLab FX<sub>FN</sub> configured as shown in Supplemental Figure 1. Purification *via* semi-preparative HPLC utilized 35% Acetonitrile, 20mM NH<sub>4</sub>OAc, 0.2% Acetic acid mobile phase at a flow rate of 4 mL/min (for a representative tracer, see Supplemental Figure 2).

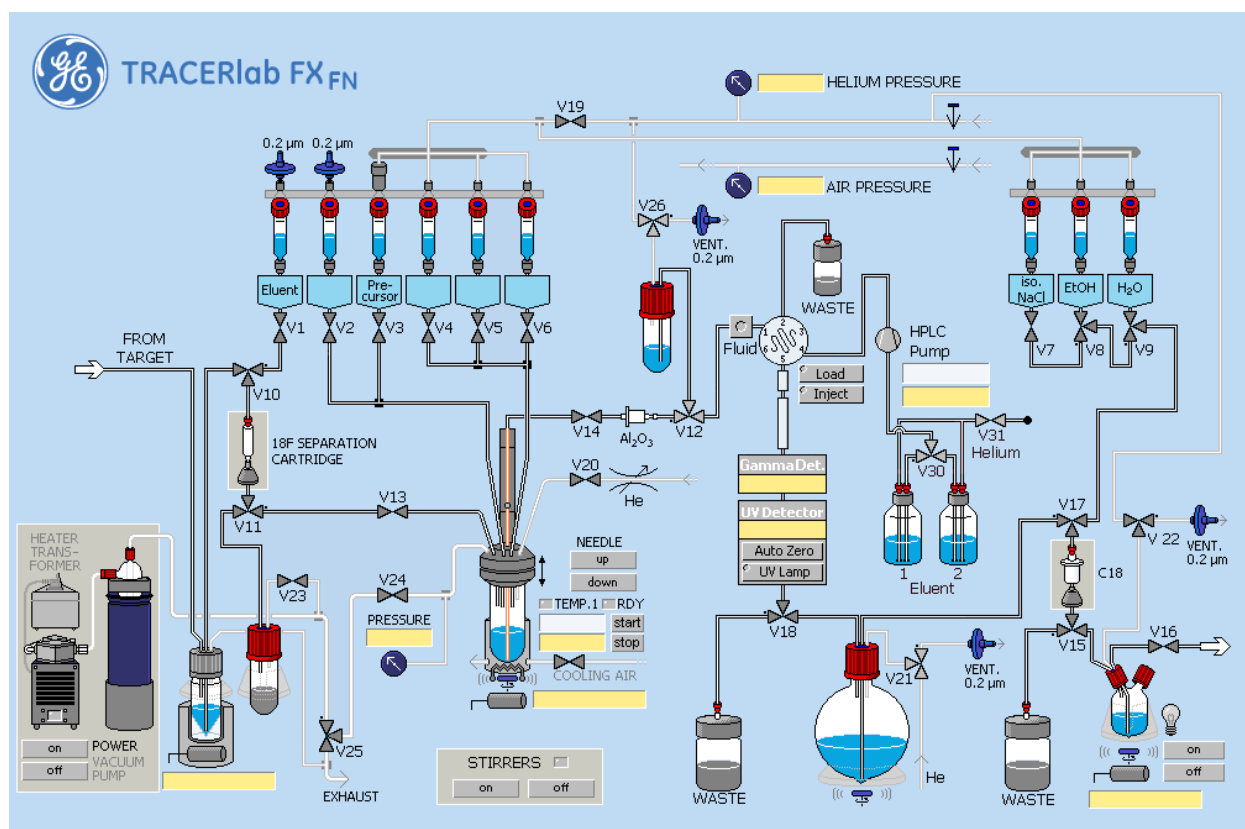

Supplement Figure 1: Synthesis module configuration.

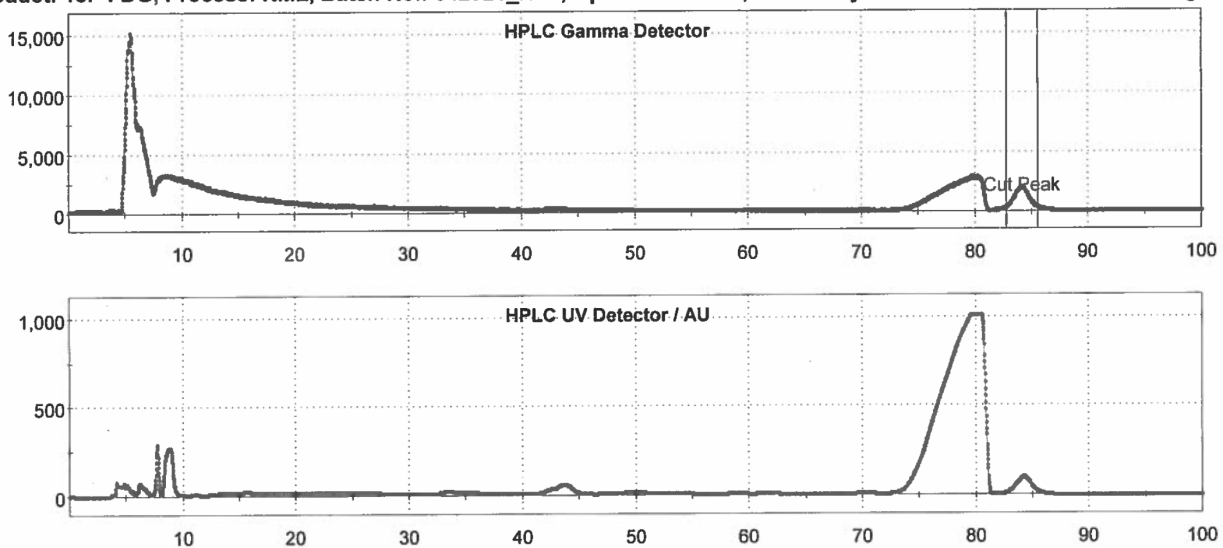

**Supplemental Figure 2:** Typical semi-preparative HPLC trace for [ $^{18}\text{F}$ ]1 (Column: Luna PFP, 250x10 mm-10 $\mu$ , flow rate: 4 mL/min, mobile phase: 40% Acetonitrile, 20 mM  $\text{NH}_4\text{OAc}$ , 0.2% Acetic acid, retention time: ~81-85 min).

The decay corrected product yield was  $66.1 \pm 17.7$  mCi (RCY 4.1%;  $n = 3$ ). Analysis by radio-HPLC confirmed >98% RCP (Supplemental Figure 3), radiochemical identity via co-injection with unlabeled reference standard (Supplemental Figure 4) and that the product was stable for at least 150 min post-end-of-synthesis (Supplemental Figure 5).

**UV Detector Chromatogram**

mV

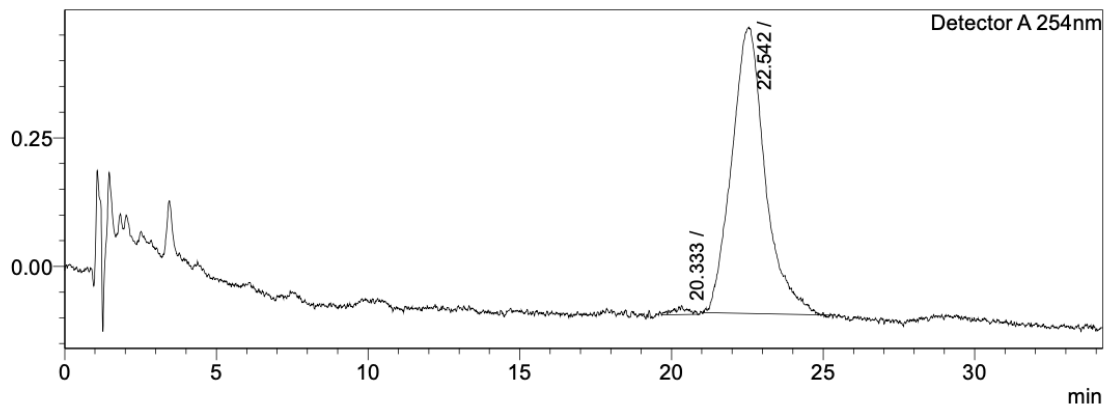

UV Detector

Detector A 254nm

| Ret. Time | Area  | Area%  | Peak# |
|-----------|-------|--------|-------|
| 20.333    | 509   | 1.177  | 1     |
| 22.542    | 42719 | 98.823 | 2     |

**RAD Detector Chromatogram**

mV

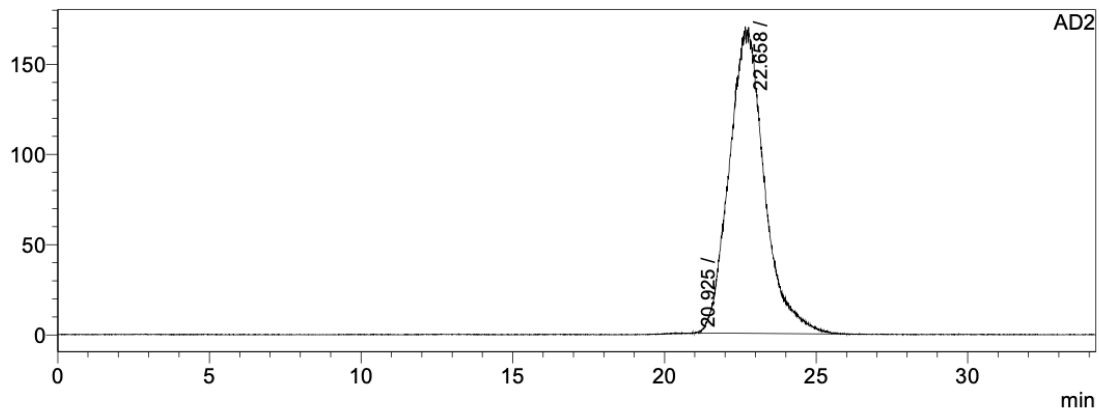

RAD Detector

AD2

| Ret. Time | Area     | Area%  | Peak# |
|-----------|----------|--------|-------|
| 20.925    | 928      | 0.007  | 1     |
| 22.658    | 13628989 | 99.993 | 2     |

**Supplemental Figure 3:** Analytical HPLC trace for [ $^{18}\text{F}$ ]1: Column: Luna PFP, 150x4.6 mm-5 $\mu$ , flow rate: 2 mL/min, mobile phase: 30% Acetonitrile, 20 mM  $\text{NH}_4\text{OAc}$ , 0.2% Acetic acid, retention time: ~22-23 min.

### UV Detector Chromatogram

mV

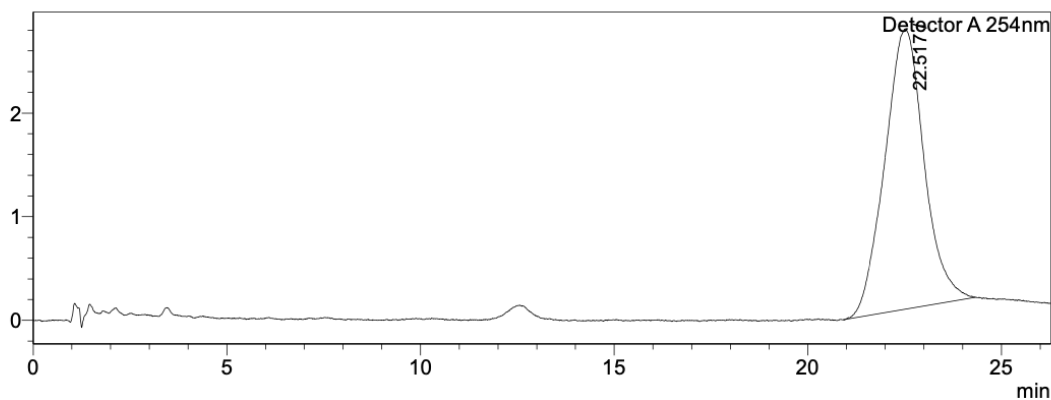

UV Detector

Detector A 254nm

| Ret. Time | Area   | Area%   | Peak# |
|-----------|--------|---------|-------|
| 22.517    | 190884 | 100.000 | 1     |

### RAD Detector Chromatogram

mV

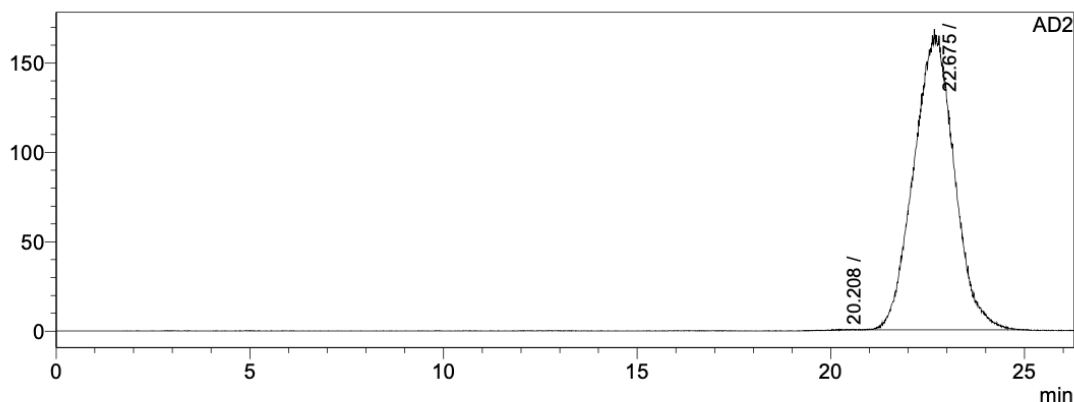

RAD Detector

AD2

| Ret. Time | Area     | Area%  | Peak# |
|-----------|----------|--------|-------|
| 20.208    | 4075     | 0.034  | 1     |
| 22.675    | 12039721 | 99.966 | 2     |

**Supplemental Figure 4:** Analytical HPLC trace for [ $^{18}\text{F}$ ]1: Coinjection of standard 1 compound (UV) with purified reaction product from radiochemical synthesis. Purified radiochemical product injected with cold standard, HPLC method repeated from Supp. Fig. 4. Integrations provided.

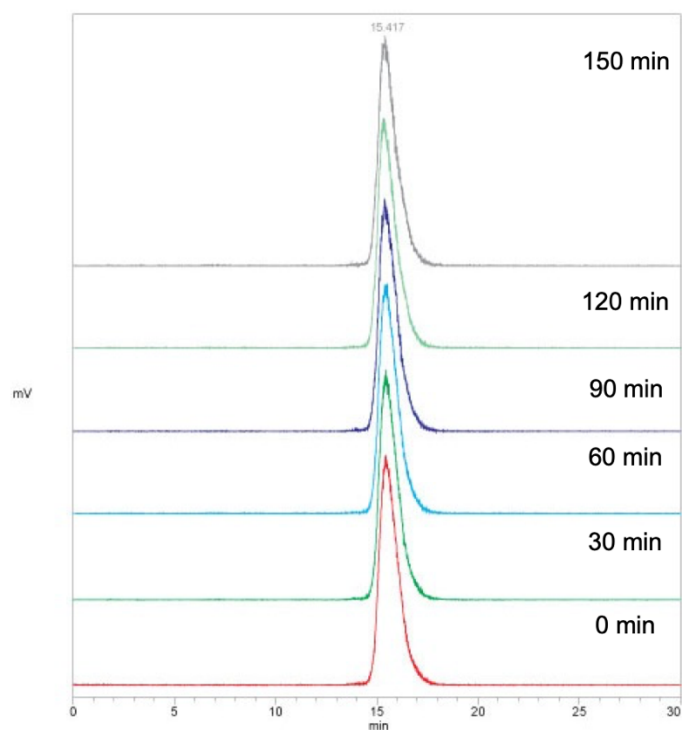

| Time post EOS (min) | RCP (%) |
|---------------------|---------|
| 0                   | 99      |
| 30                  | 99      |
| 60                  | 99      |
| 90                  | 99      |
| 120                 | 99      |
| 150                 | 99      |

**Supplemental Figure 5: HPLC stability trace for  $[^{18}\text{F}]\mathbf{1}$ :** An Analytical HPLC trace of  $[^{18}\text{F}]\mathbf{1}$  at different time points. Product is stable in solution for 150 minutes from the end of synthesis.

### Screening of Different Filters

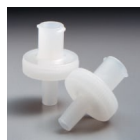

A

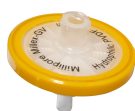

B

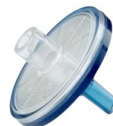

C

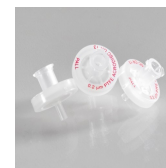

D

| Entry | Filter type       | Residue on filter (mCi) | Recovered in vial (mCi) | % Recovered |
|-------|-------------------|-------------------------|-------------------------|-------------|
| A.    | Small GV (white)  | 4.01                    | 2.25                    | 40.3        |
| B.    | Large GV (yellow) | 5.84                    | 0.5                     | 7.9         |
| C.    | GS filter (blue)  | 5.49                    | 0.05                    | 0.9         |
| D.    | PTFE (white-red)  | 2.05                    | 0.07                    | 3.3         |

**Supplemental Figure 6: Screening of different filter types** Previous reports of related molecules<sup>1</sup> used a formulation of 5% ethanol in saline. We observed with this formulation a loss of product to the filter and on the syringe, barrels used to transfer the dose for analysis. Alternate plastic types were evaluated for the sterile filter, but all showed retention of the  $[^{18}\text{F}]\mathbf{1}$  and a loss of product. As a result, a formulation with Tween-80 was employed to improve the collection of  $[^{18}\text{F}]\mathbf{1}$  in the sterile dose vial.

## 2. Preclinical Experiments

### 2.1 Saturation Binding Curves

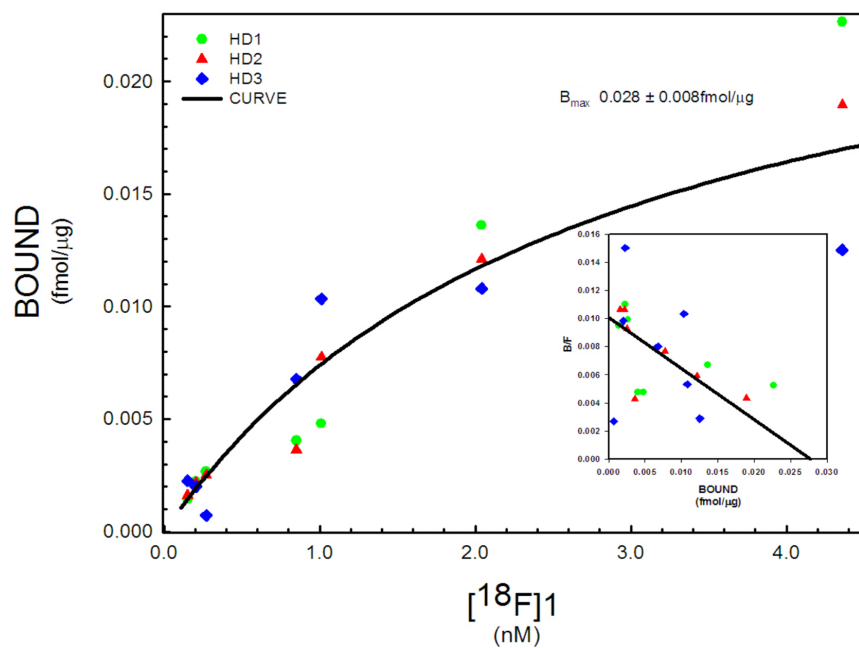

**Supplementary Figure 7.** Saturation analysis of [<sup>18</sup>F]1 showing saturable binding in HD patient putamen (n=3). Inset: Scatchard (Rosenthal) plot of specific binding.

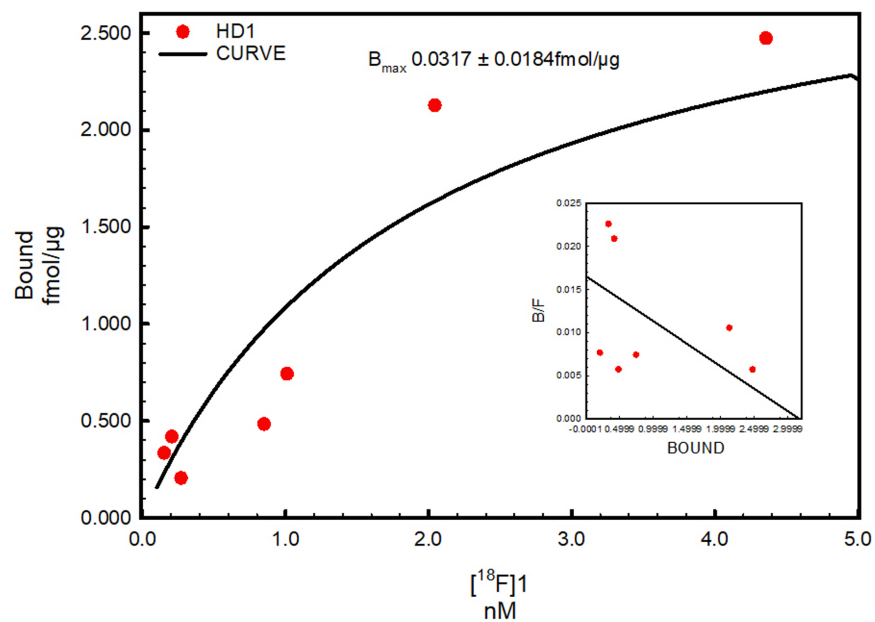

**Supplementary Figure 8.** Saturation analysis of [<sup>18</sup>F]1 showing saturable binding in HD patient caudate (n=1). Inset: Scatchard (Rosenthal) plot of specific binding.

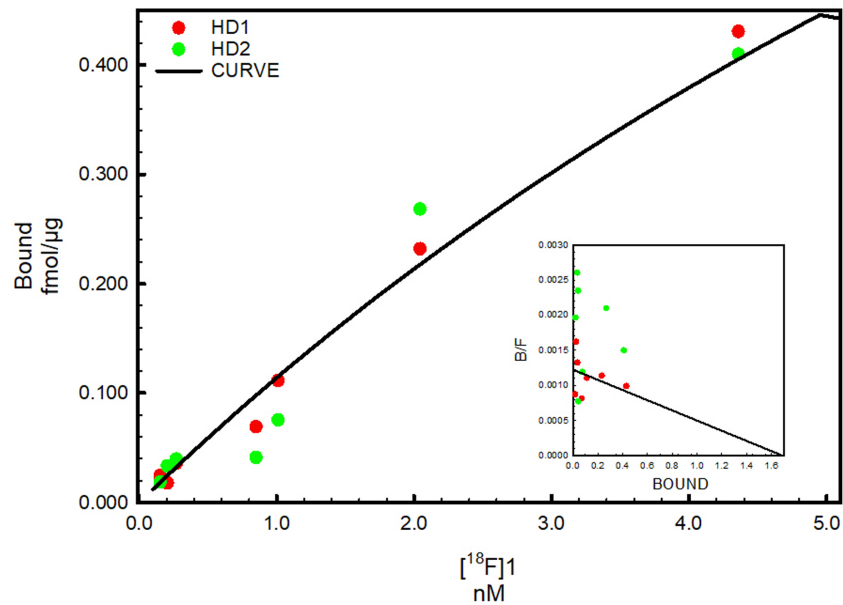

**Supplementary Figure 9.** Saturation analysis of  $[^{18}\text{F}]1$  showing saturable binding in HD patient cortex (n=1). Inset: Scatchard (Rosenthal) plot showing specific binding.

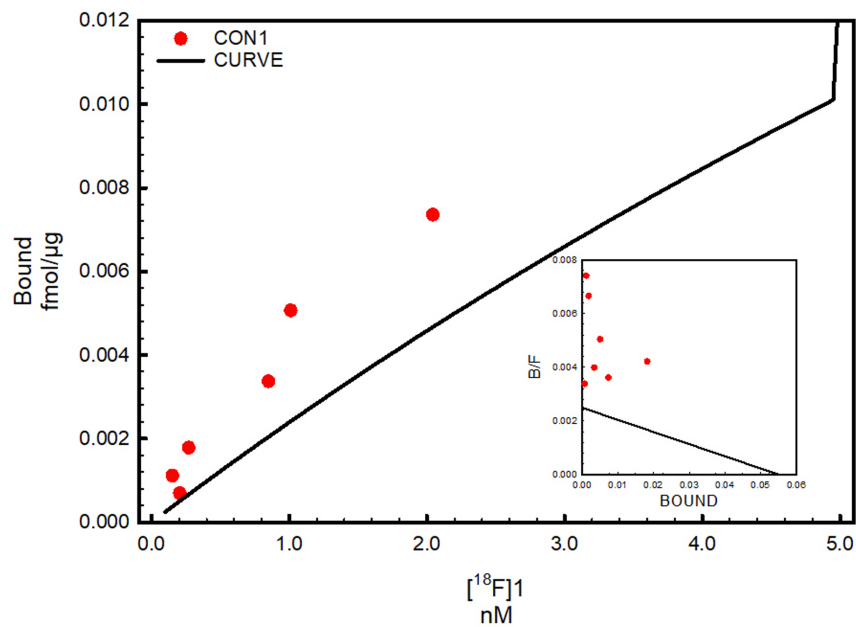

**Supplementary Figure 10.** Saturation analysis of  $[^{18}\text{F}]1$  showing no saturable binding in control subject putamen (n=1). Inset: Scatchard (Rosenthal) plot showing no specific binding.



## 2.2 Representative Autoradiography Images

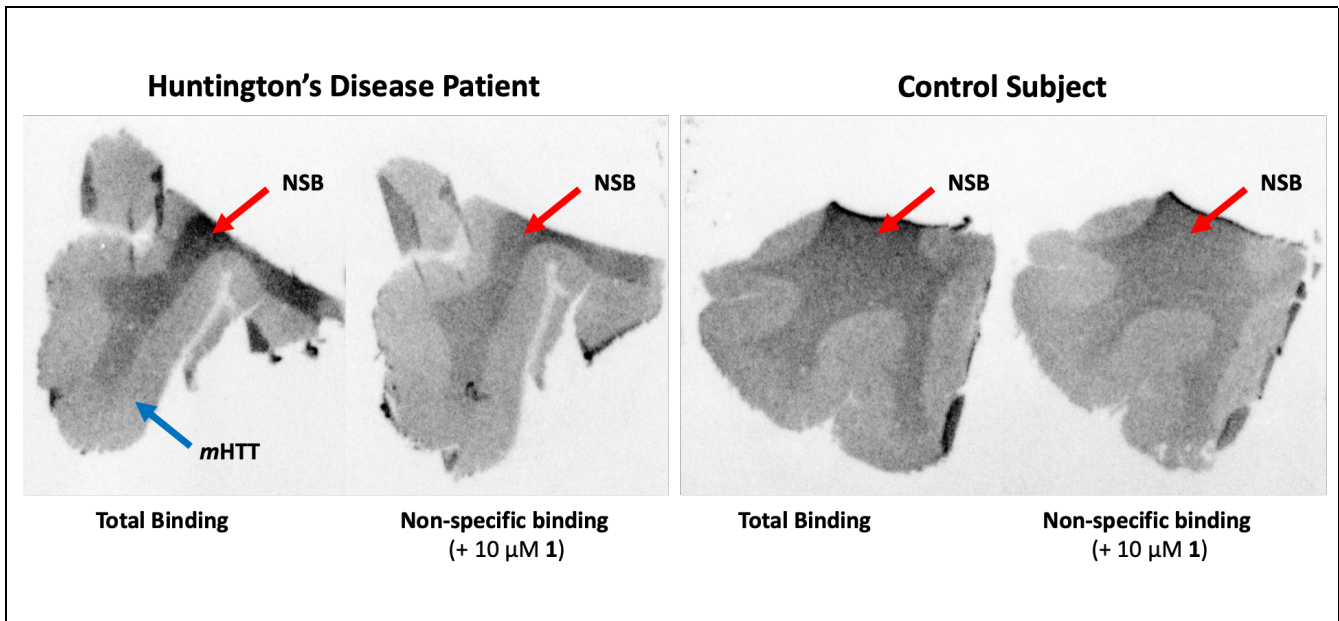

**Supplementary Figure 11.** Representative autoradiography images obtained using [ $^{18}\text{F}$ ]1 and cortical slices from an HD patient (A) and a control subject (B) showing total binding and non-specific (NSB) binding in the presence of 10  $\mu\text{M}$  1. Displaceable binding to *mHTT* (blue arrow) is apparent in the HD patient but not the control, while non-specific binding in the white matter (red arrow) is apparent in both cases.

3.  $^1\text{H}$  NMR,  $^{13}\text{C}$  NMR and HRMS Spectra3.1. (5-(2,2,2-Trifluoroethoxy)pyridin-2-yl)methanol (**3**):

TRK-37\_PROTON\_01

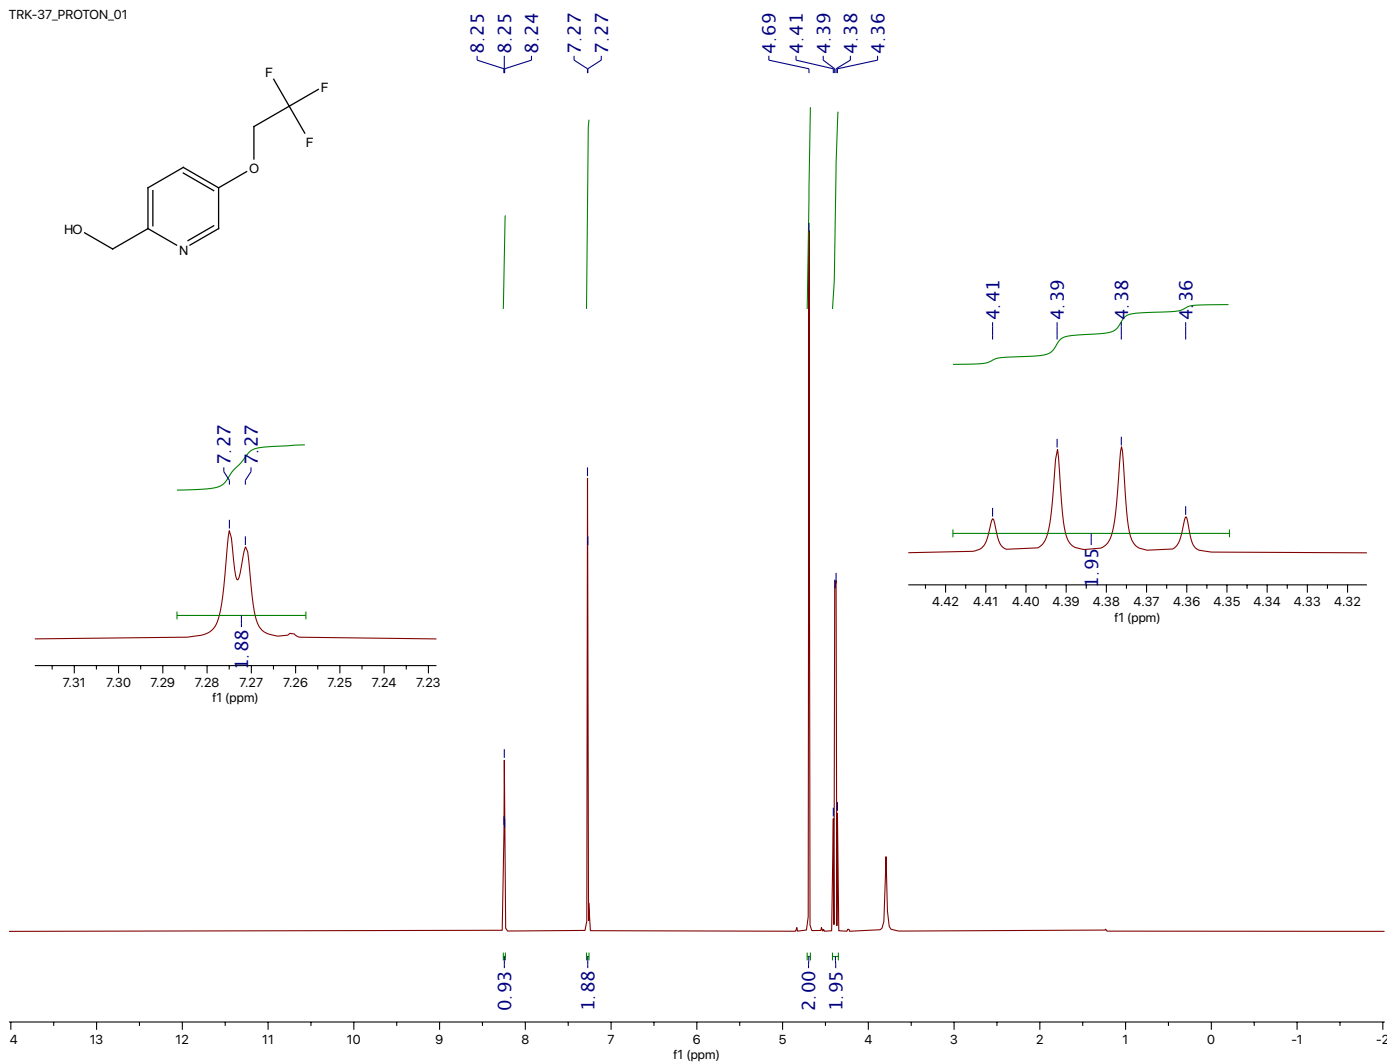Supplemental Figure 12:  $^1\text{H}$  NMR of **3**

TRK-37\_CARBON\_01

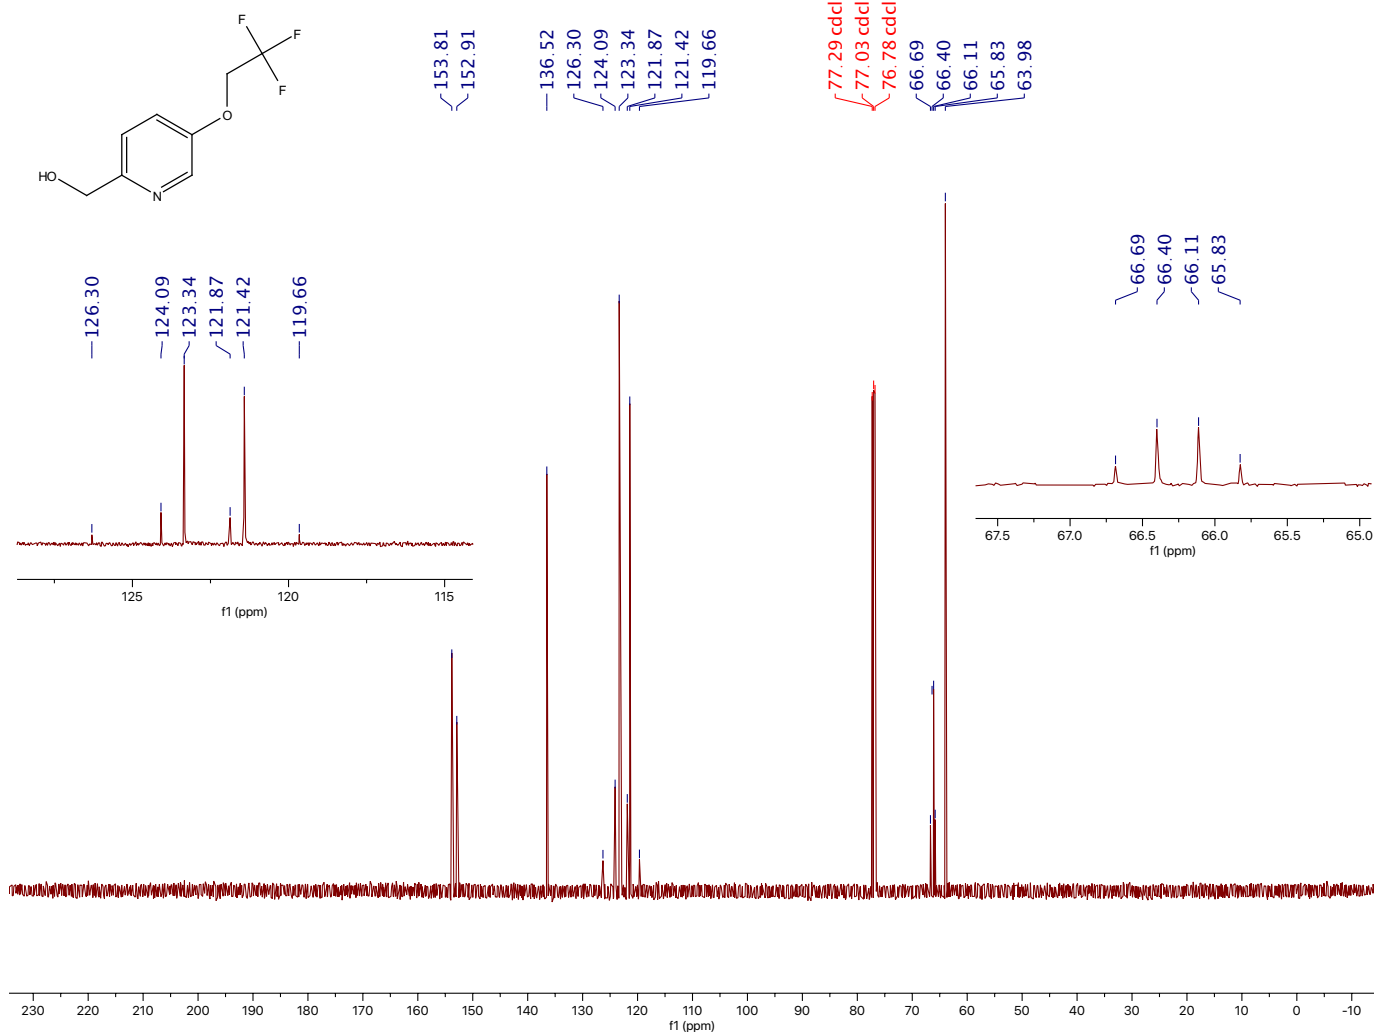

Supplemental Figure 13:  $^{13}\text{C}$  NMR of 3

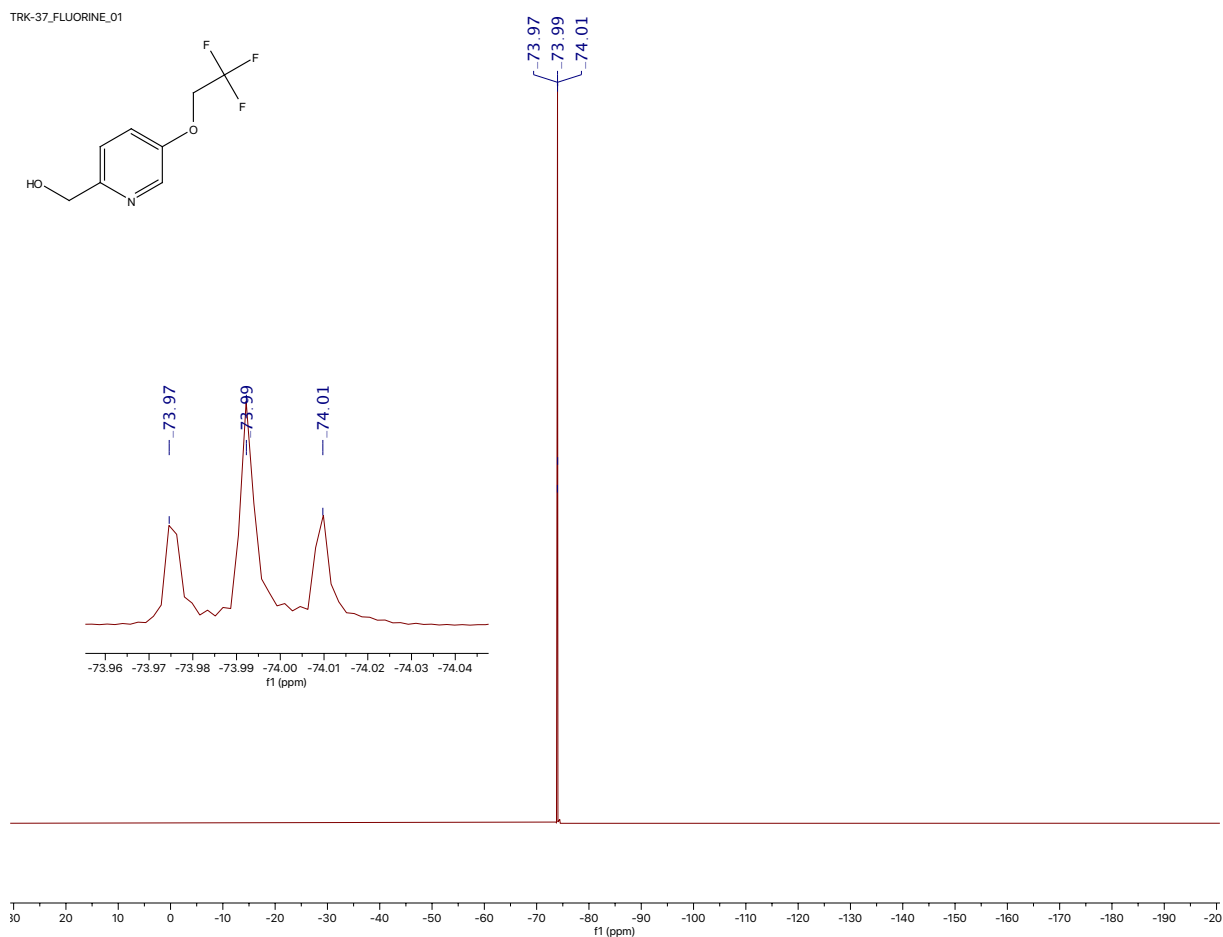Supplemental Figure 14:  $^{19}\text{F}$  NMR of 3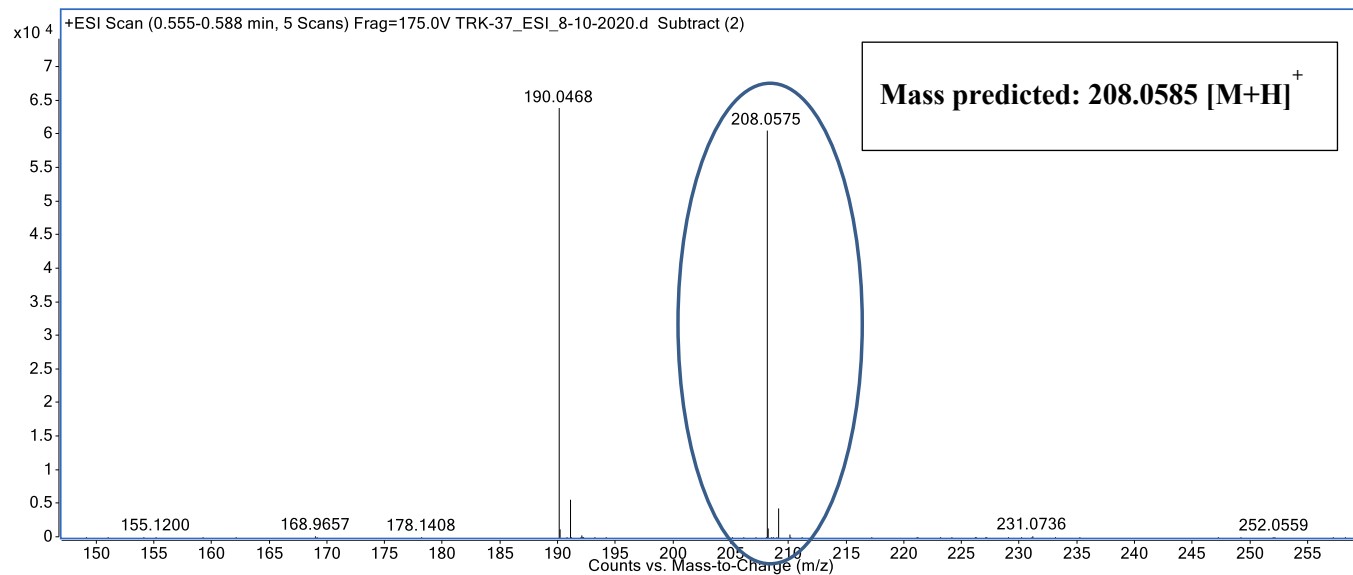

Supplemental Figure 15: HRMS of 3

### 3.2.2-Methyl-5-((5-(2,2,2-trifluoroethoxy)pyridin-2-yl)methoxy)benzo[d]oxazole (5):

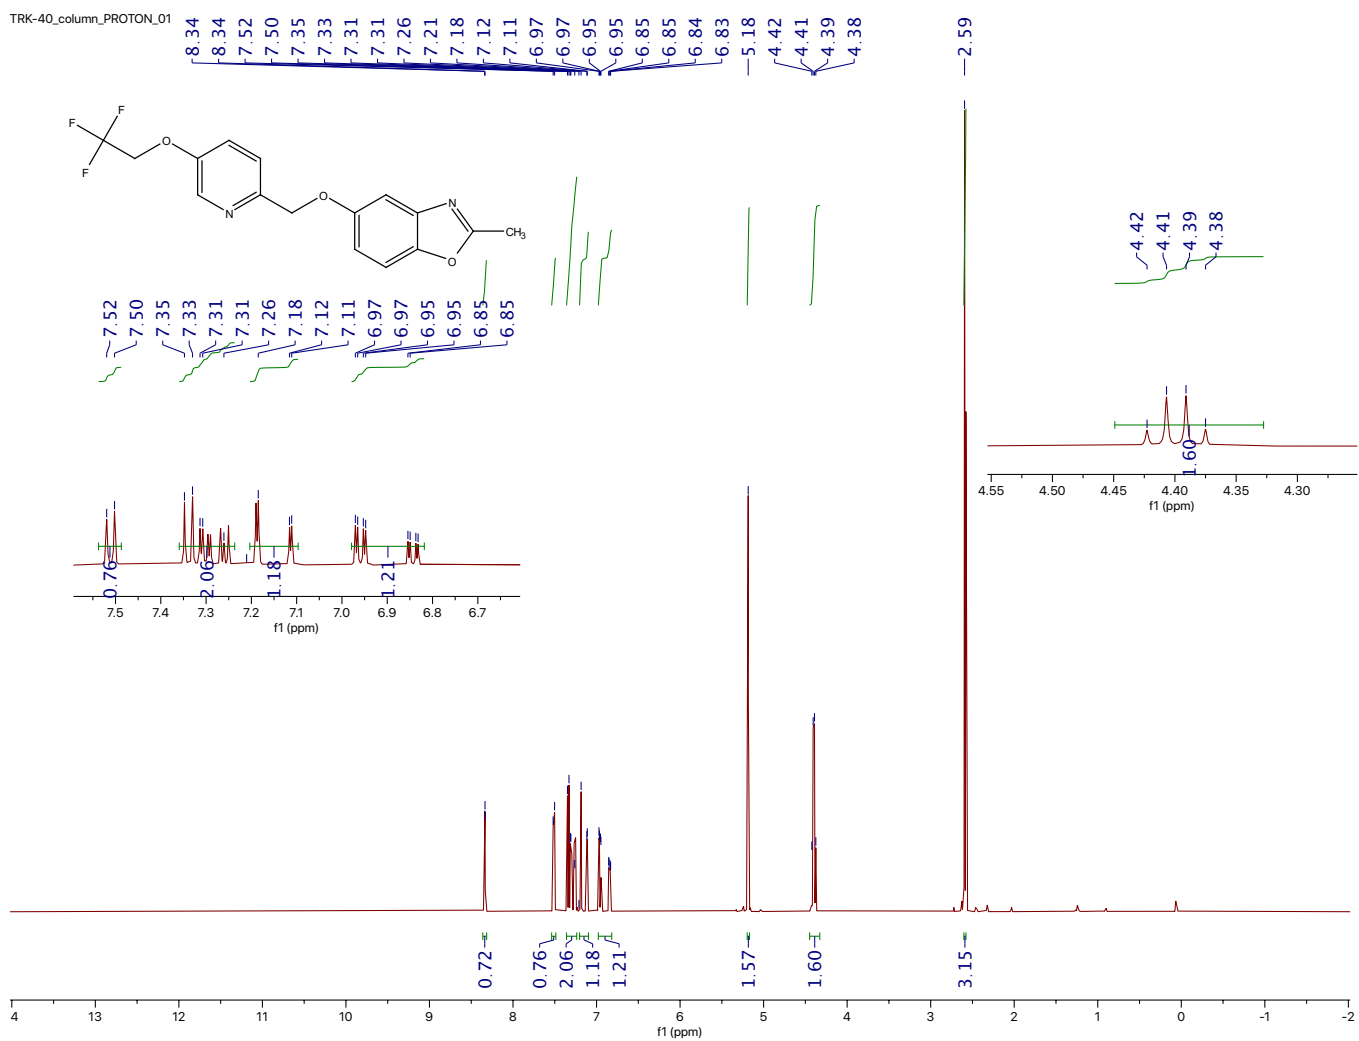

Supplemental Figure 16:  $^1\text{H}$  NMR of 5

TRK-40\_column\_CARBON\_01

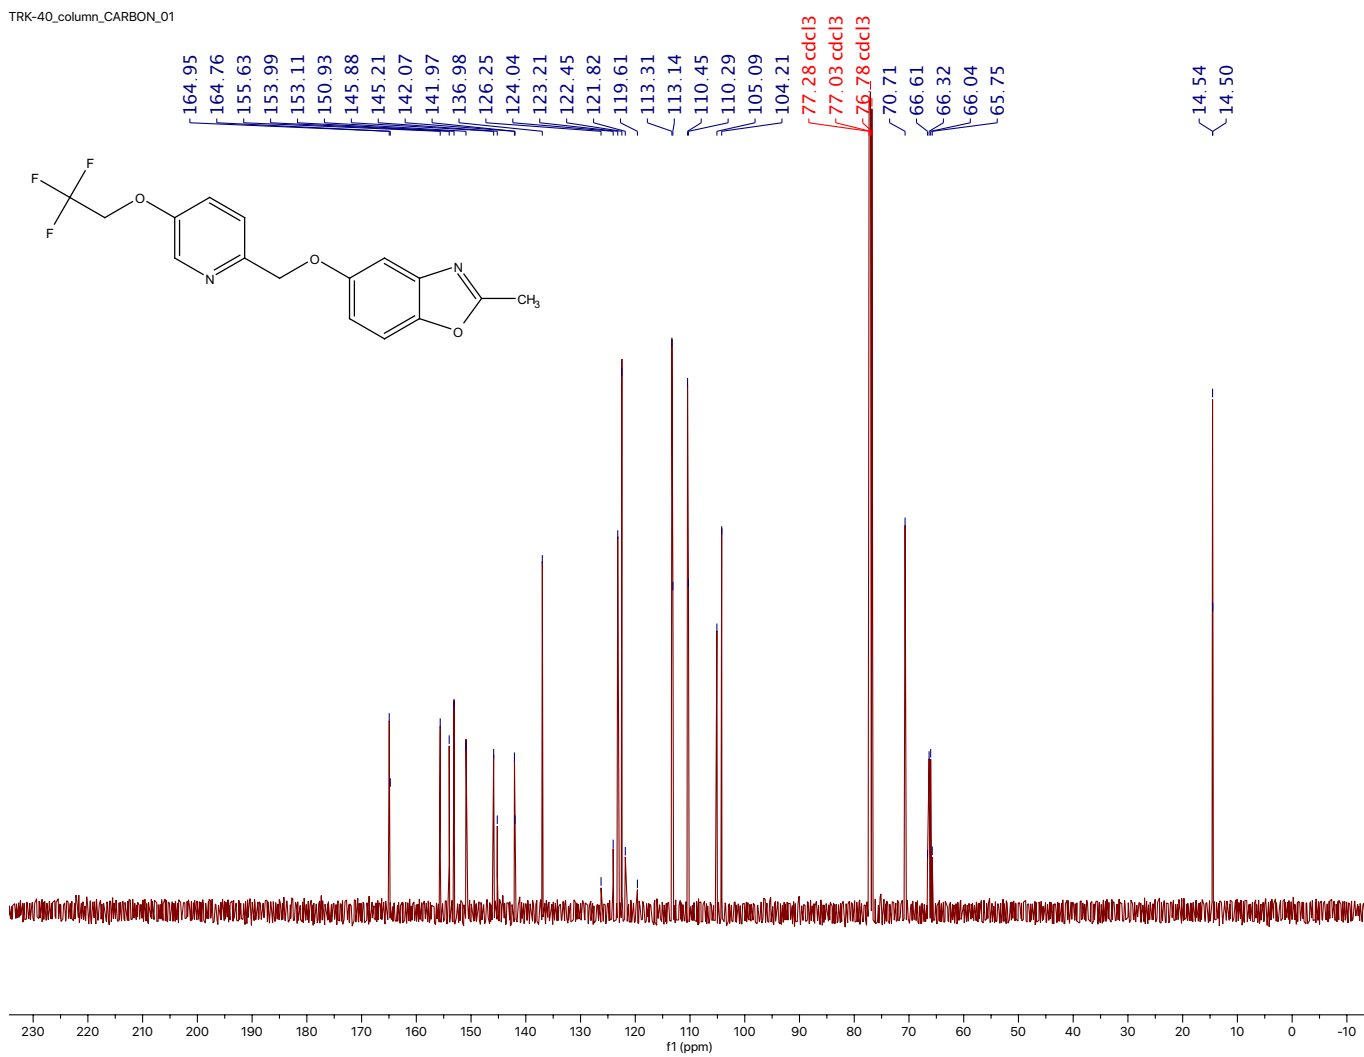Supplemental Figure 17:  $^{13}\text{C}$  NMR of 5

TRK-40\_column\_FLUORINE\_01

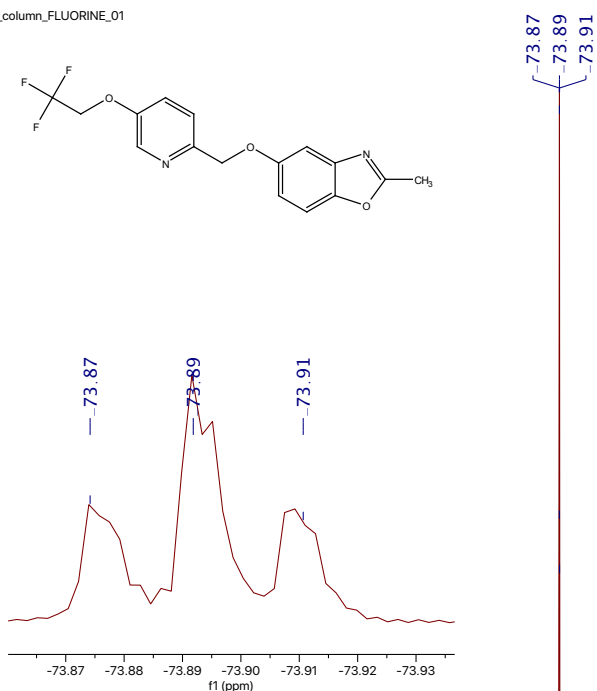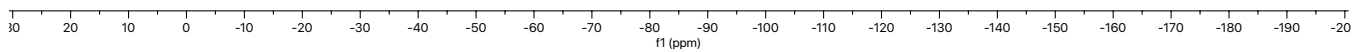

Supplemental Figure 18:  $^{19}\text{F}$  NMR of 5

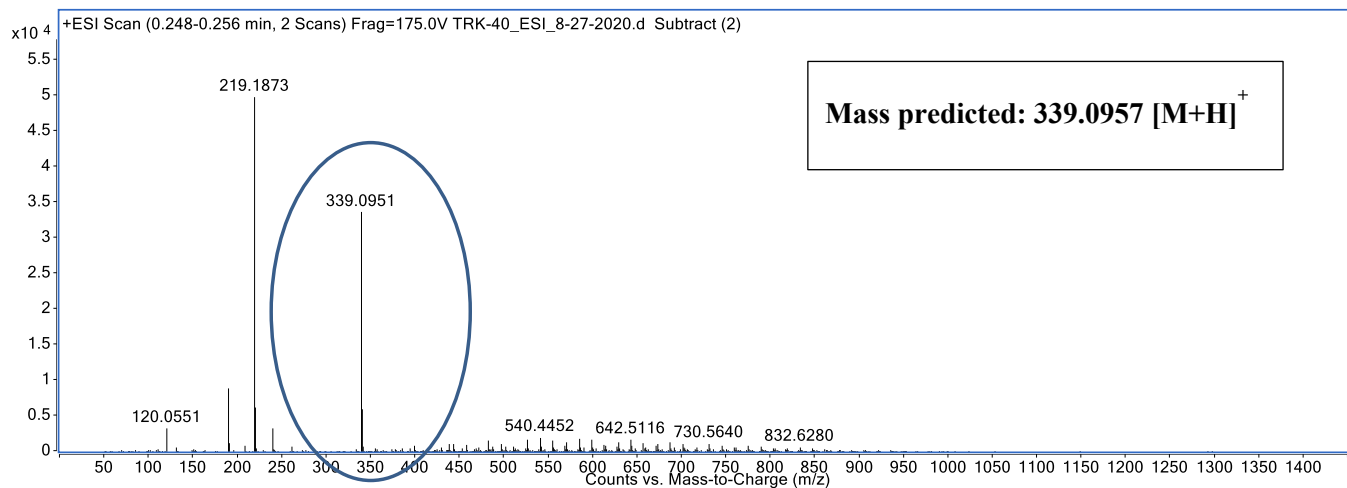

Supplemental Figure 19: HRMS of 5

**3.3.2-Amino-4-((5-(2,2,2-trifluoroethoxy)pyridin-2-yl)methoxy)phenol (7):**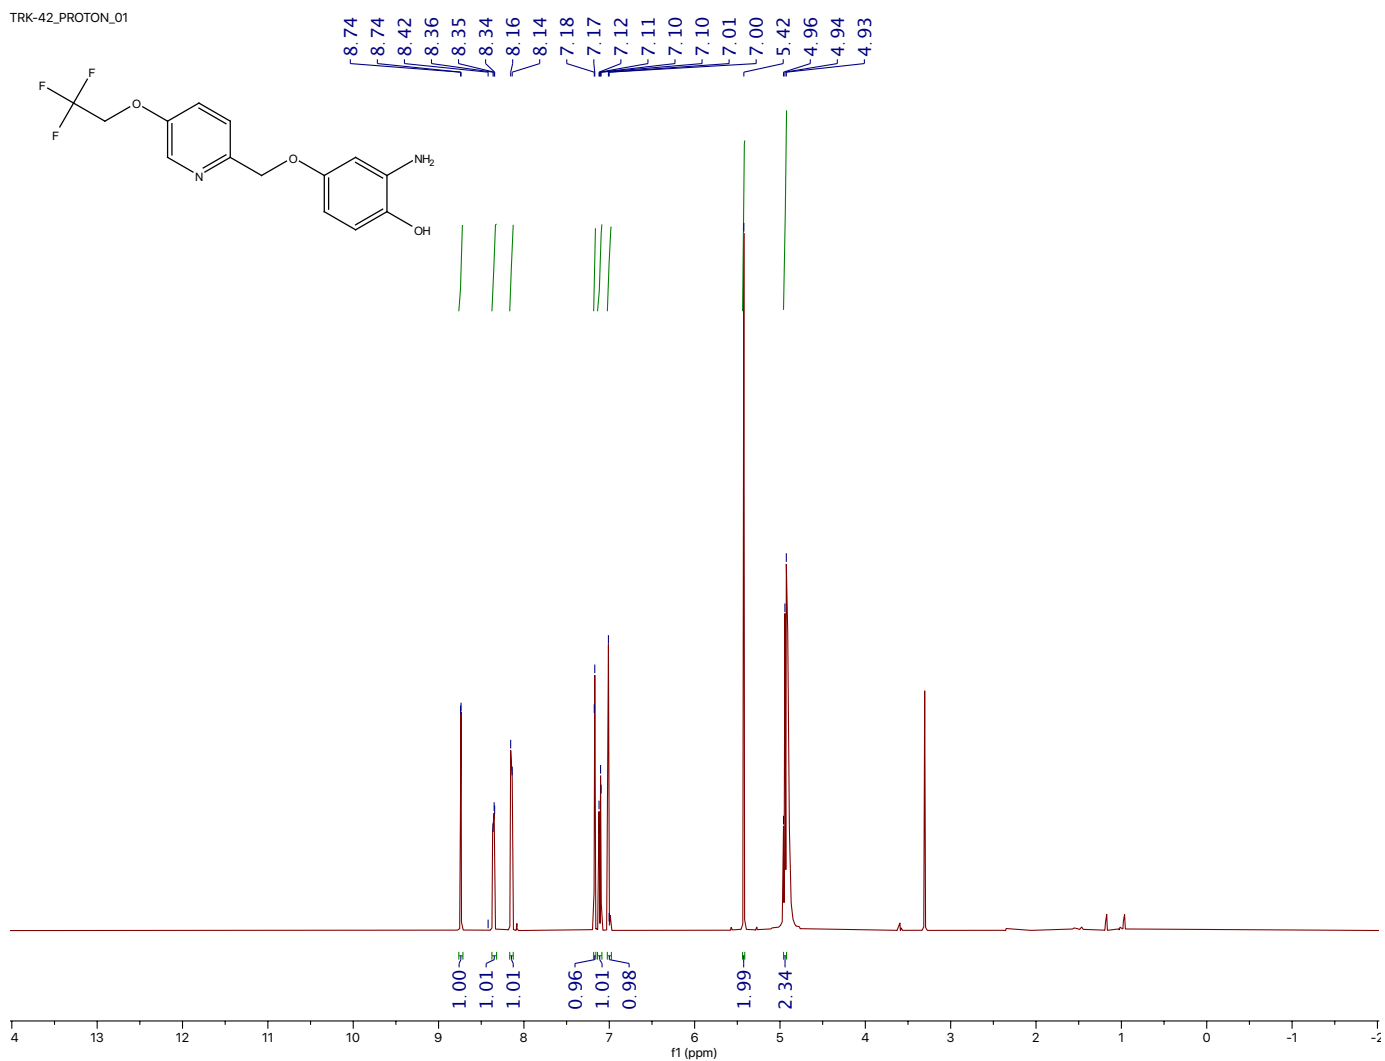**Supplemental Figure 20: <sup>1</sup>H NMR of 7**



TRK-42\_CARBON\_01

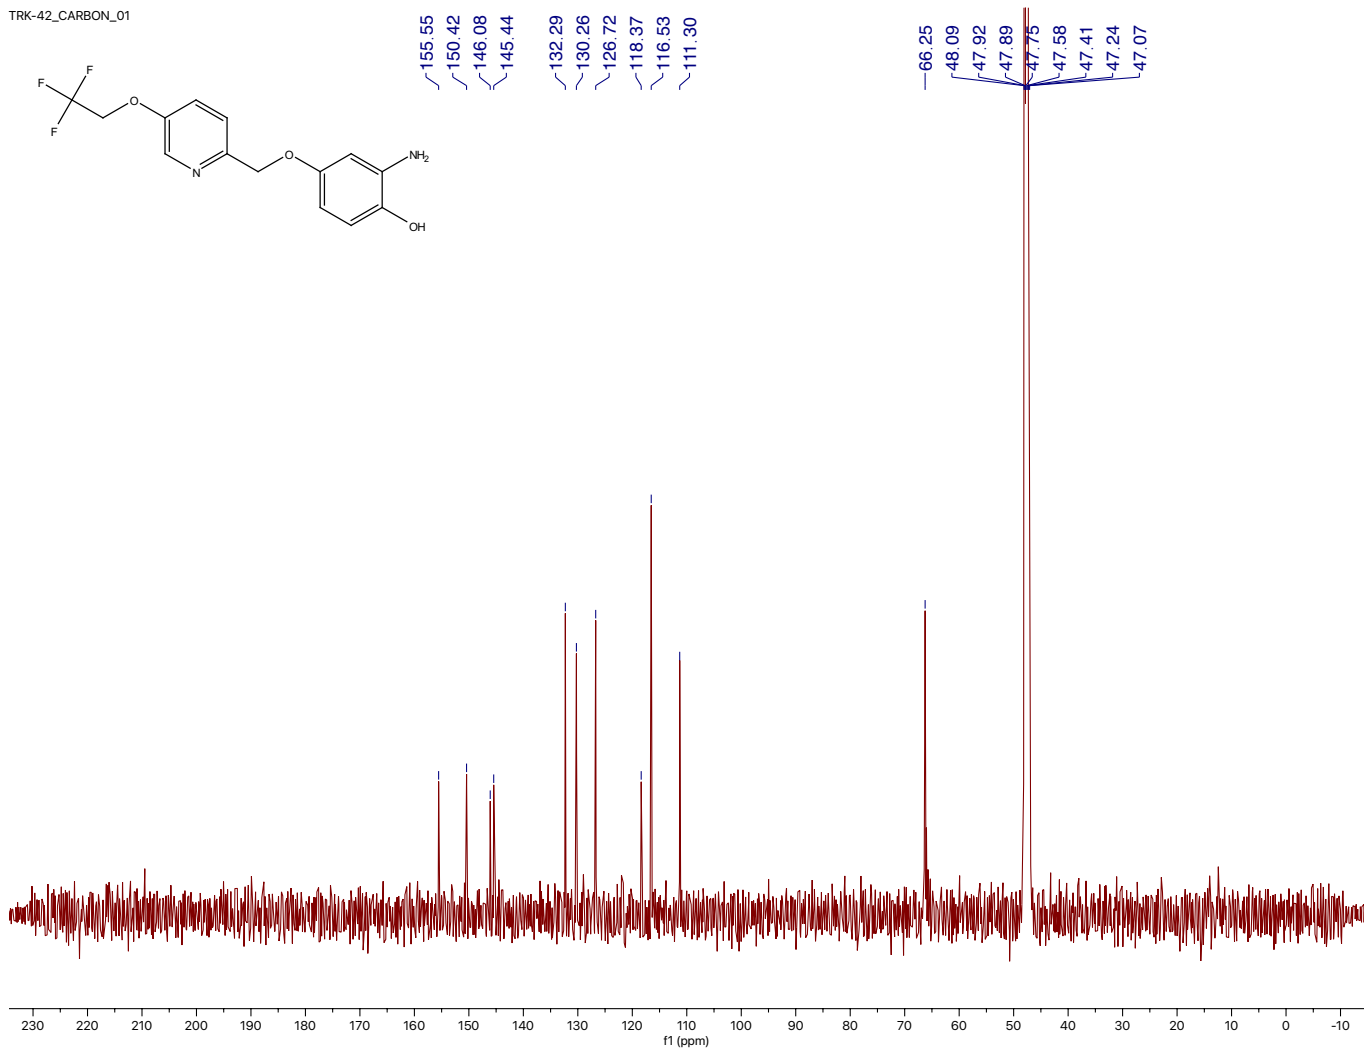

Supplemental Figure 21: <sup>13</sup>C NMR of 7

TRK-42\_FLUORINE\_01

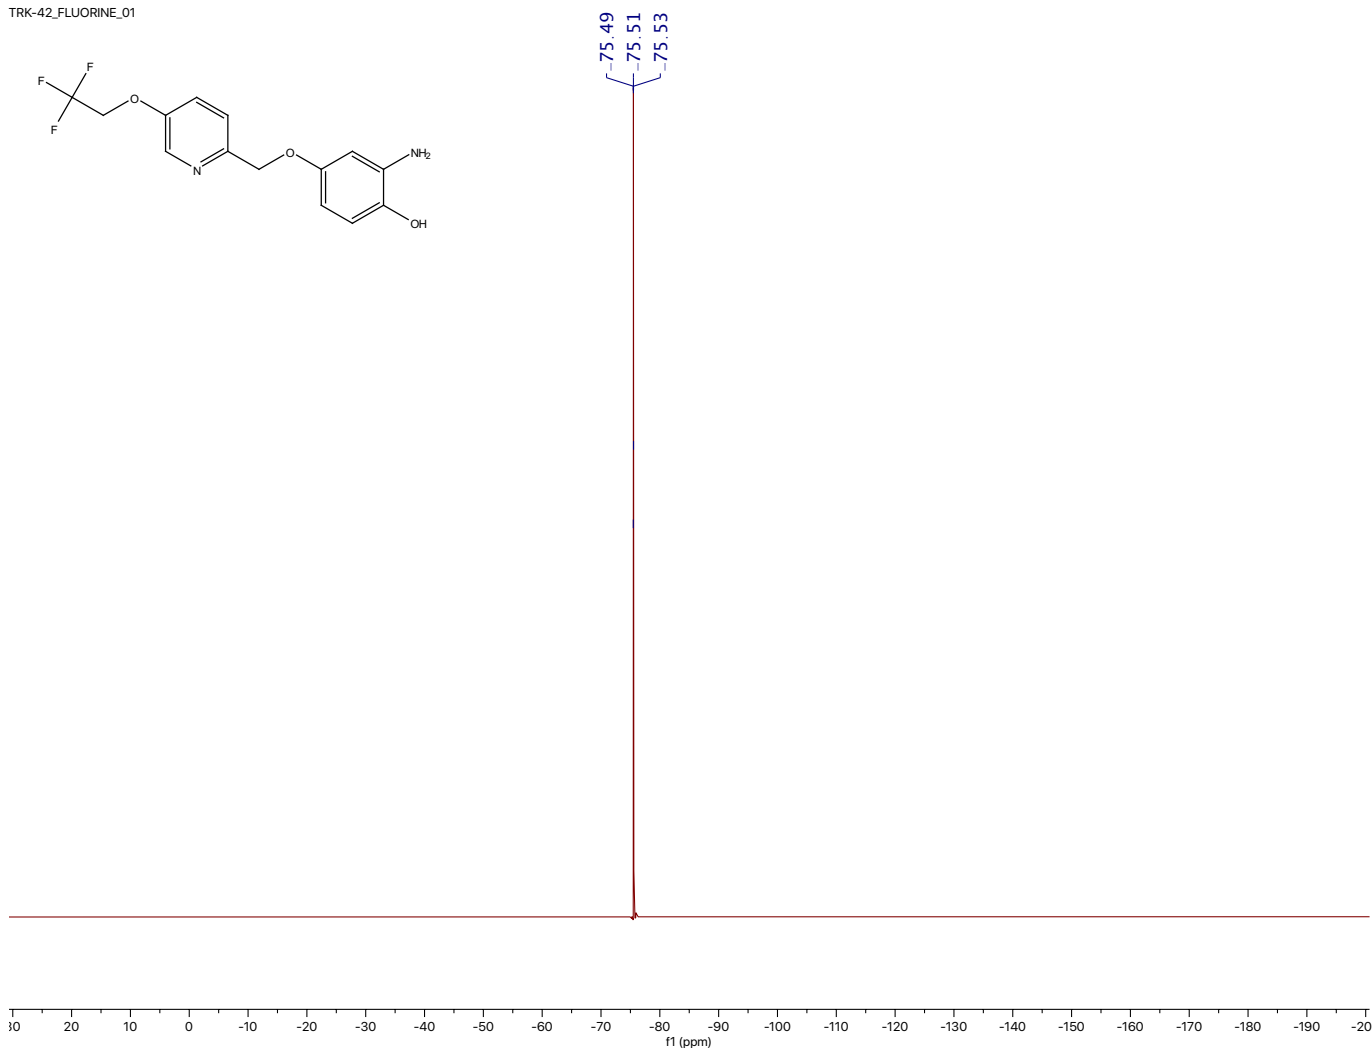Supplemental Figure 22:  $^{19}\text{F}$  NMR of 7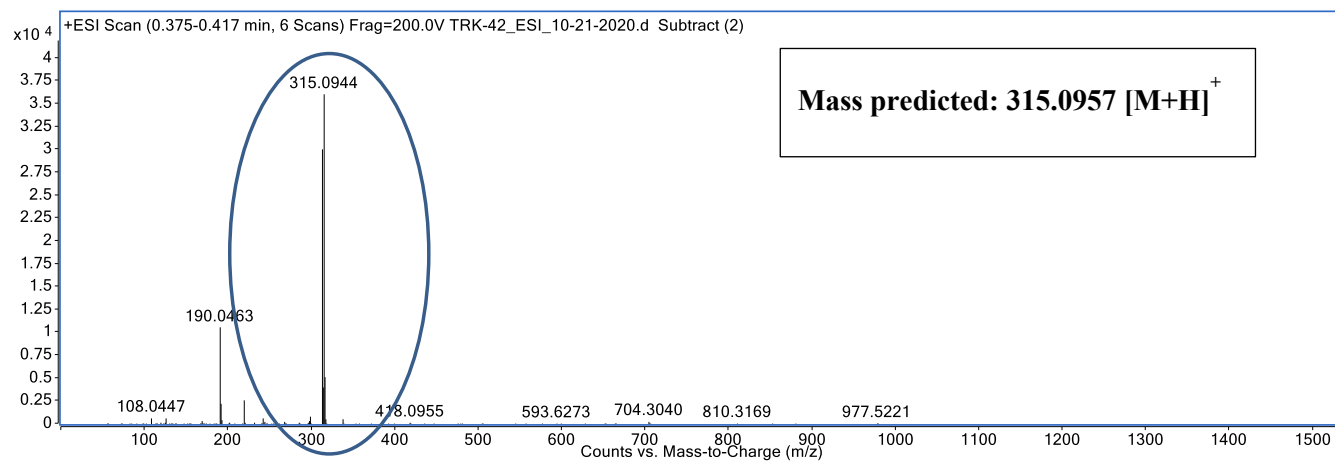

Supplemental Figure 23: HRMS of 7



TRK-43\_CARBON\_01

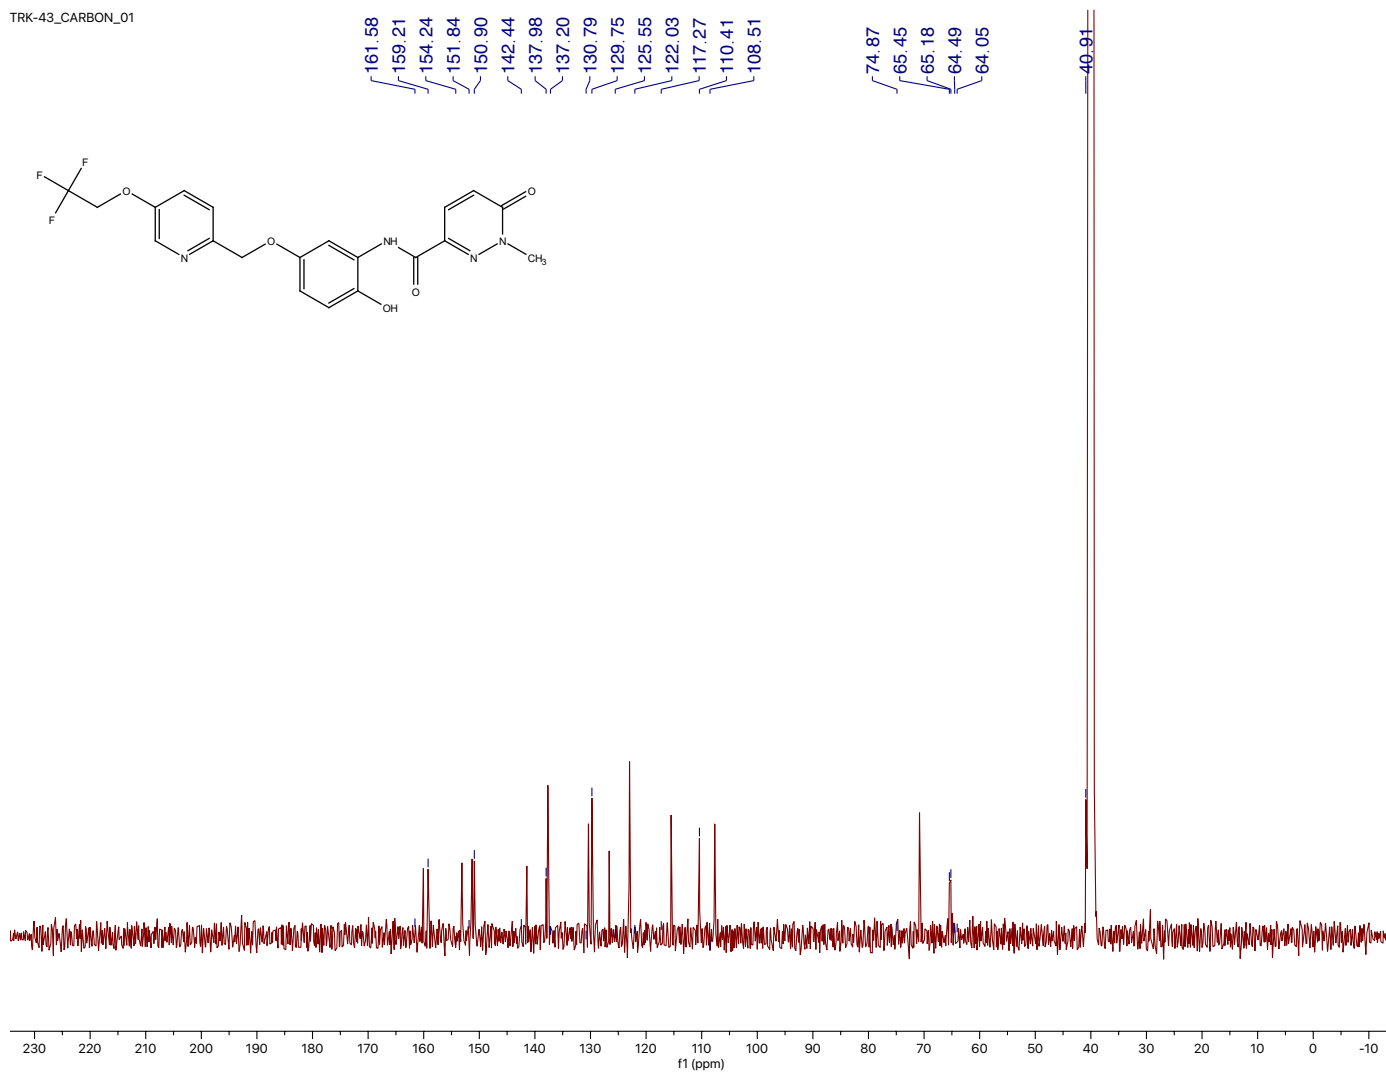Supplemental Figure 25: <sup>13</sup>C NMR of 9

TRK-43\_FLUORINE\_01

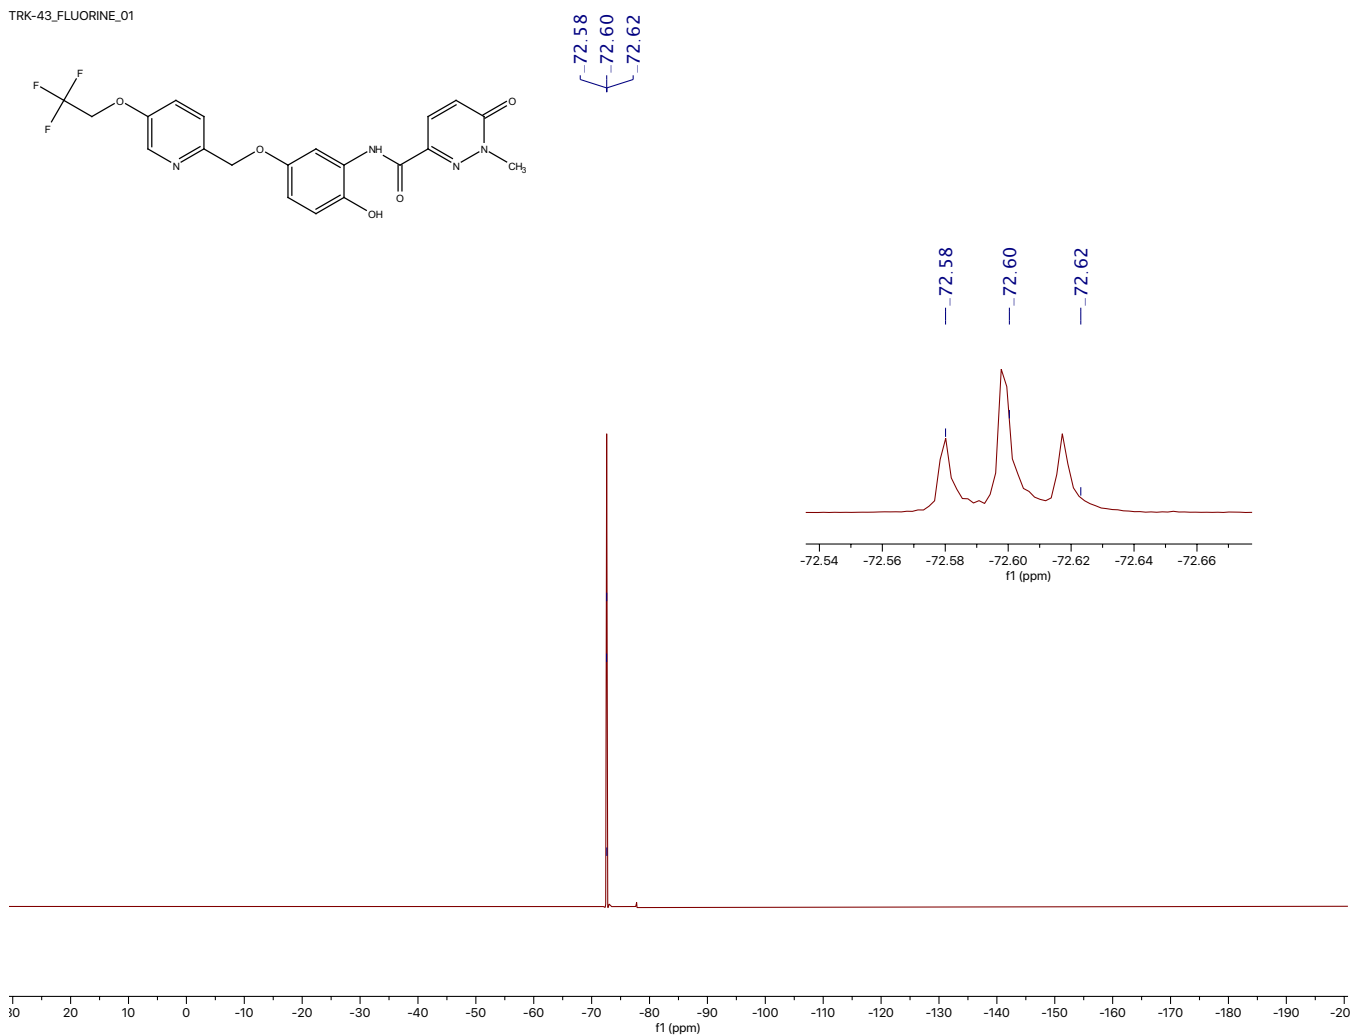

Supplemental Figure 26:  $^{19}\text{F}$  NMR of 9

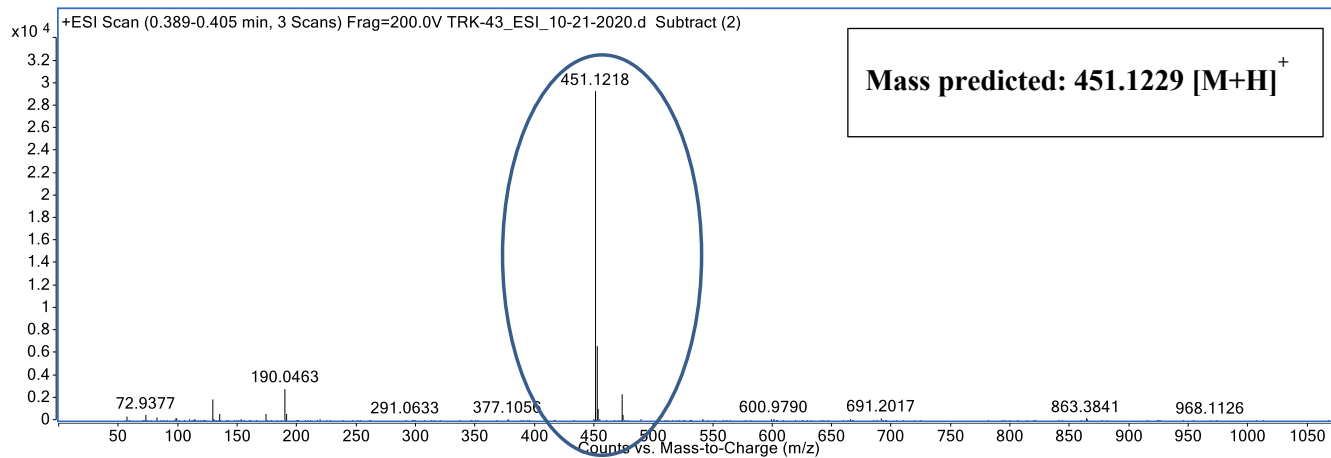

Supplemental Figure 27: HRMS of 9

**3.5.2-Methyl-6-(5-((5-(2,2,2-trifluoroethoxy)pyridin-2-yl)methoxy)benzo[d]oxazol-2-yl)pyridazin-3(2H)-one (1):**

TRK-51\_PROTON\_01

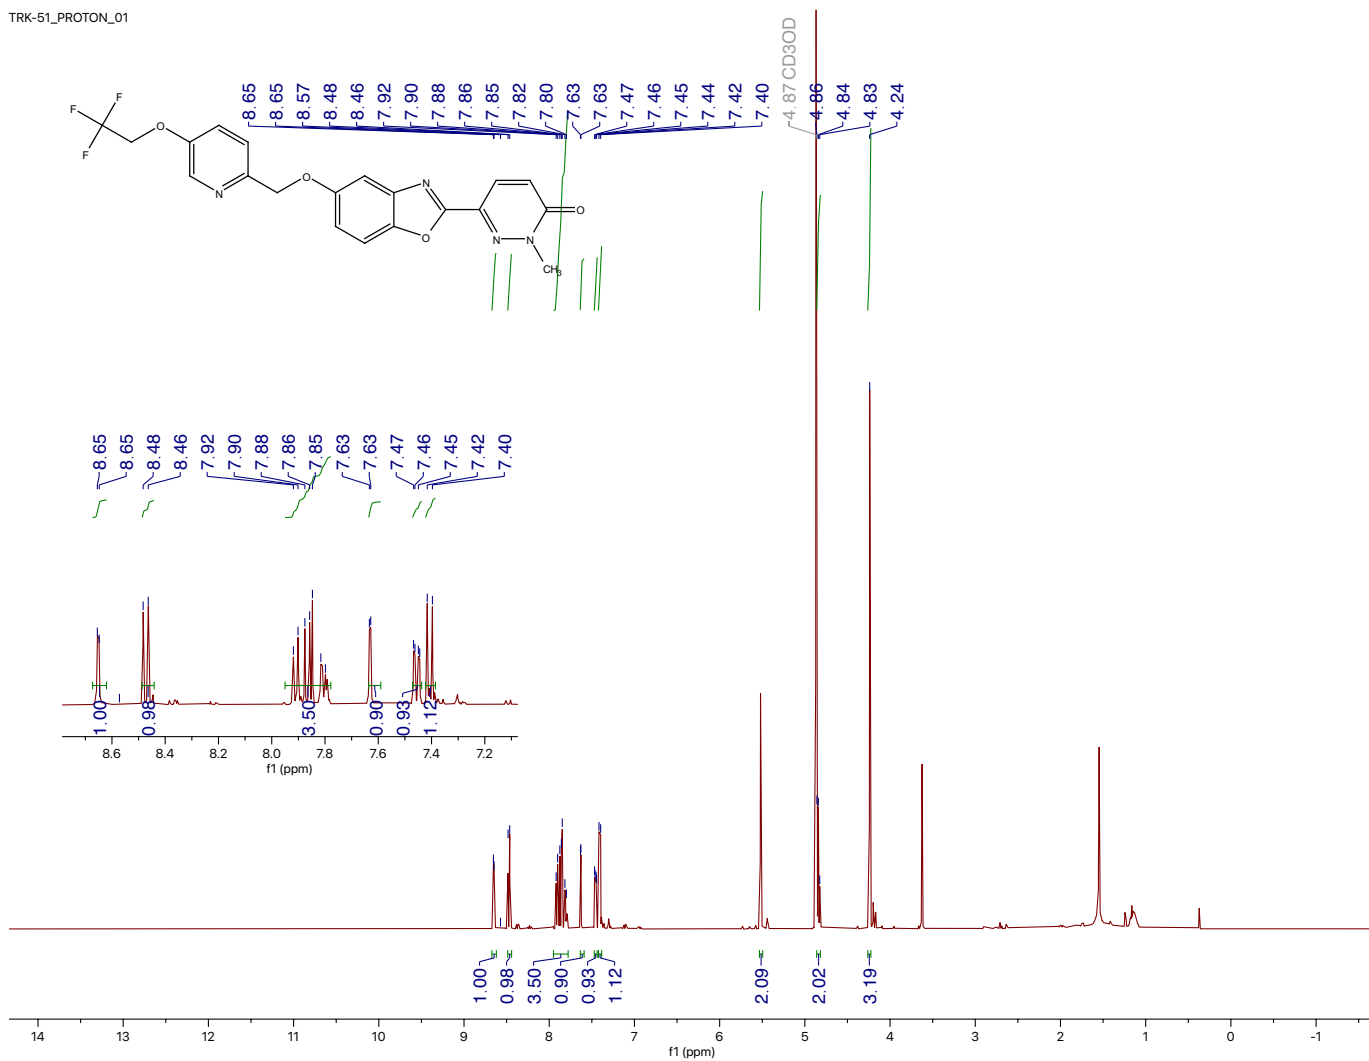**Supplemental Figure 28: <sup>1</sup>H NMR of 1**

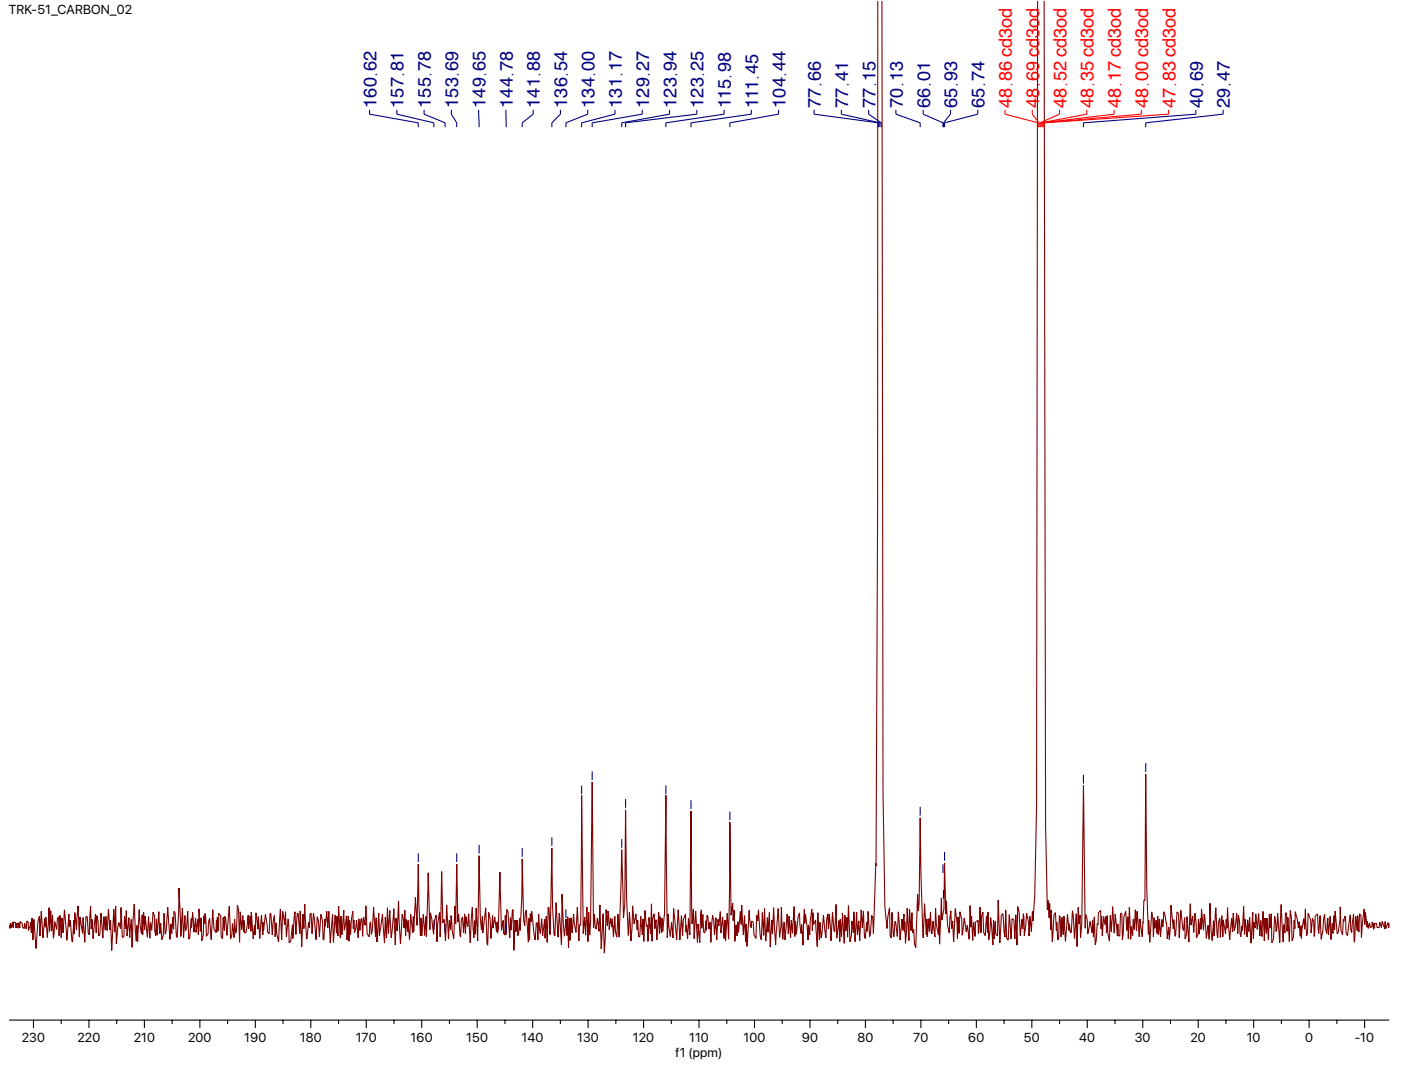

Supplemental Figure 29:  $^{13}\text{C}$  NMR of **1**

TRK-51\_FLUORINE\_01

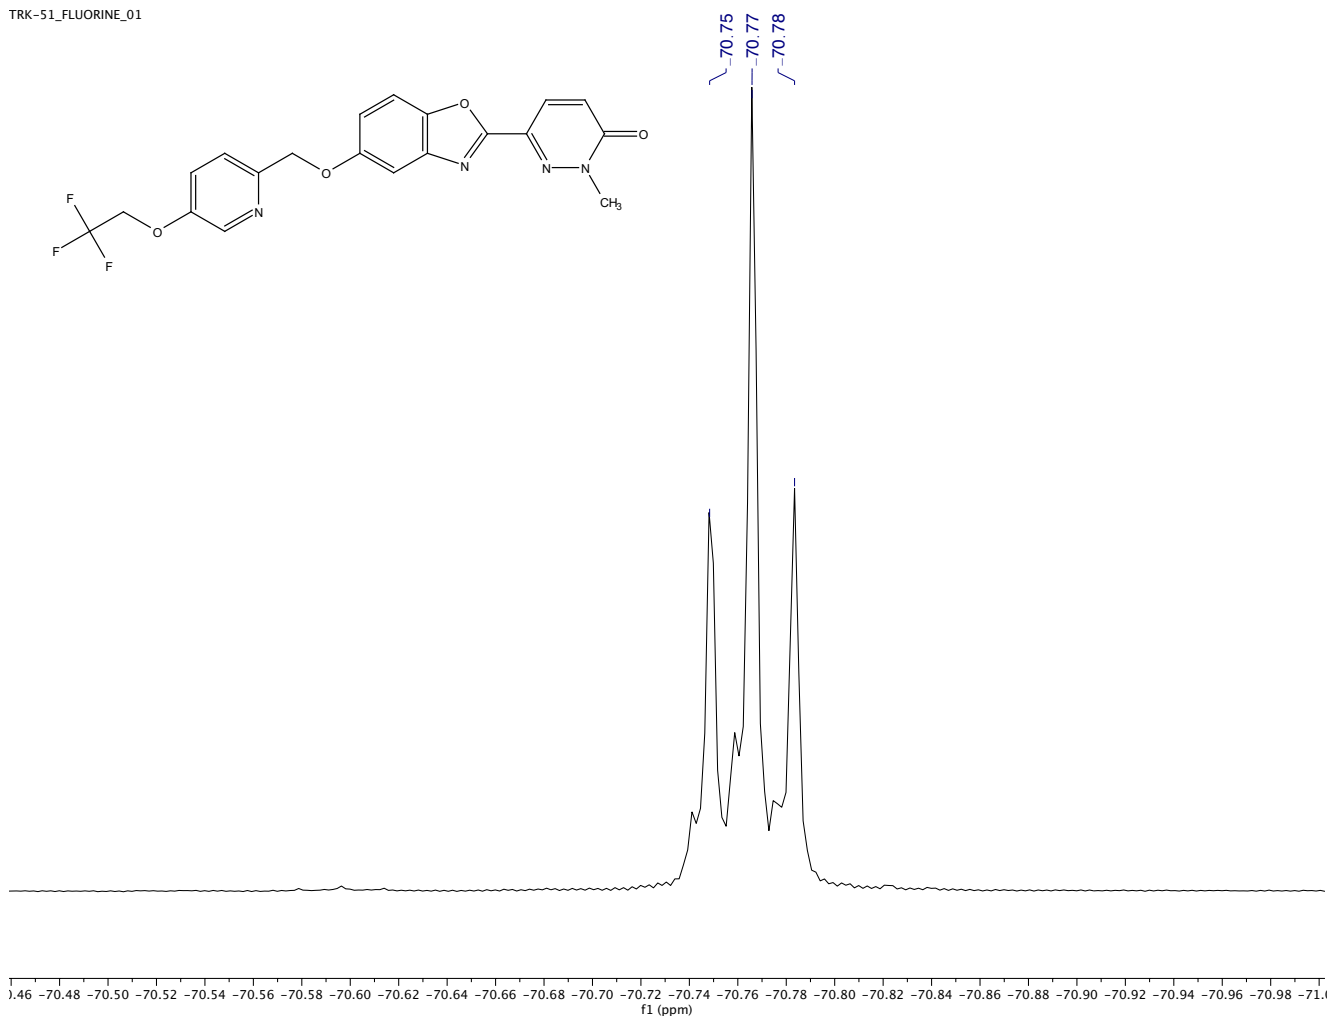Supplemental Figure 30:  $^{19}\text{F}$  NMR of 1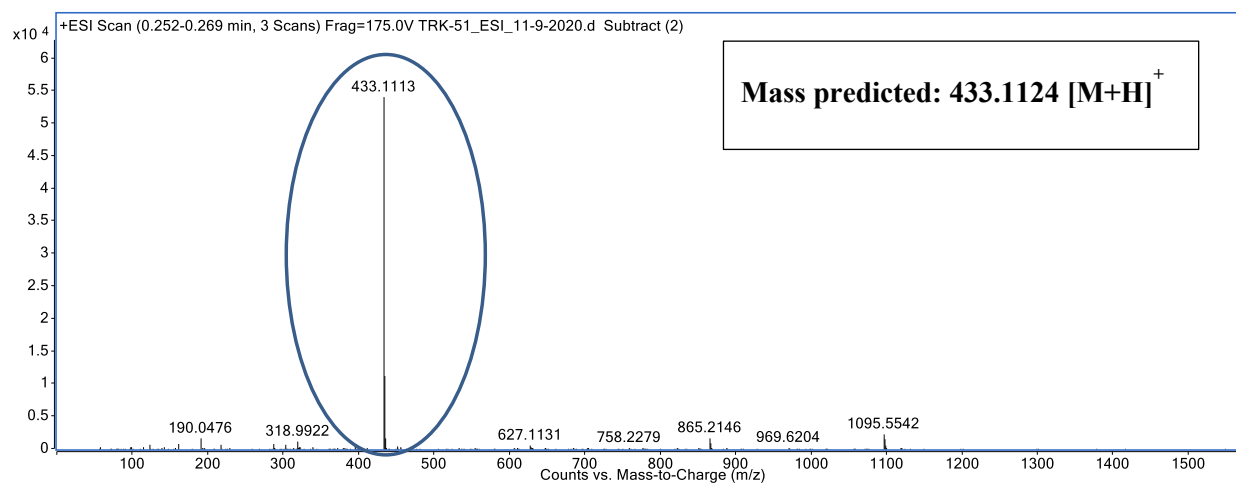

Supplemental Figure 31: HRMS of 1



### 3.6. (5-((2,2-Difluorovinyl)oxy)pyridin-2-yl)methanol (4):

TRK-62\_PROTON\_02

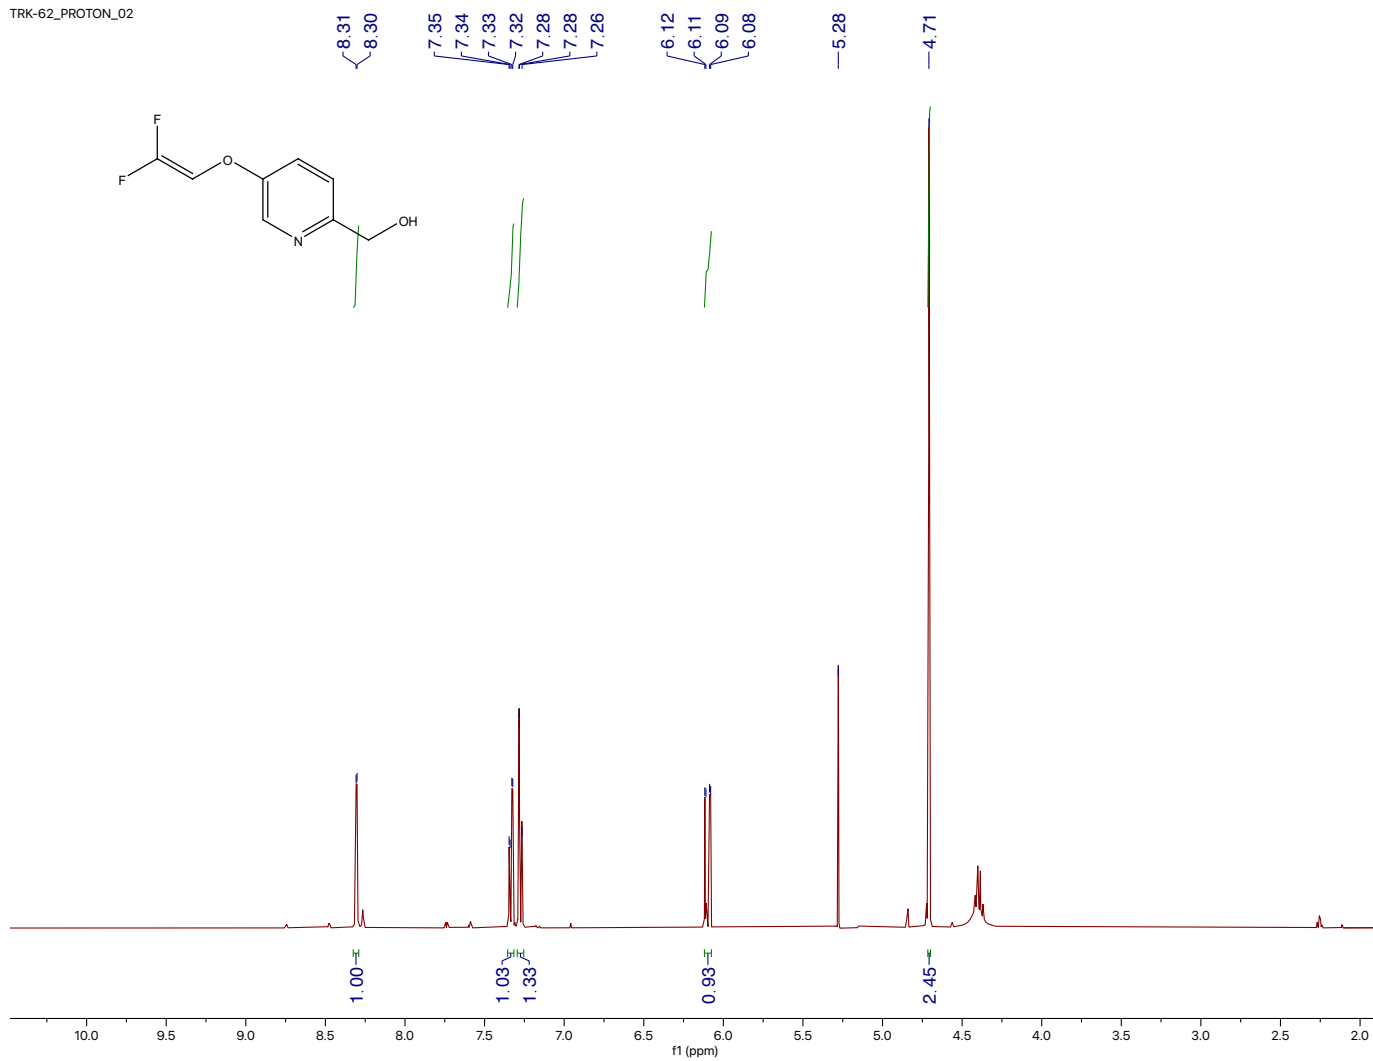

Supplemental Figure 32: <sup>1</sup>H NMR of 4

TRK-62\_CARBON\_01

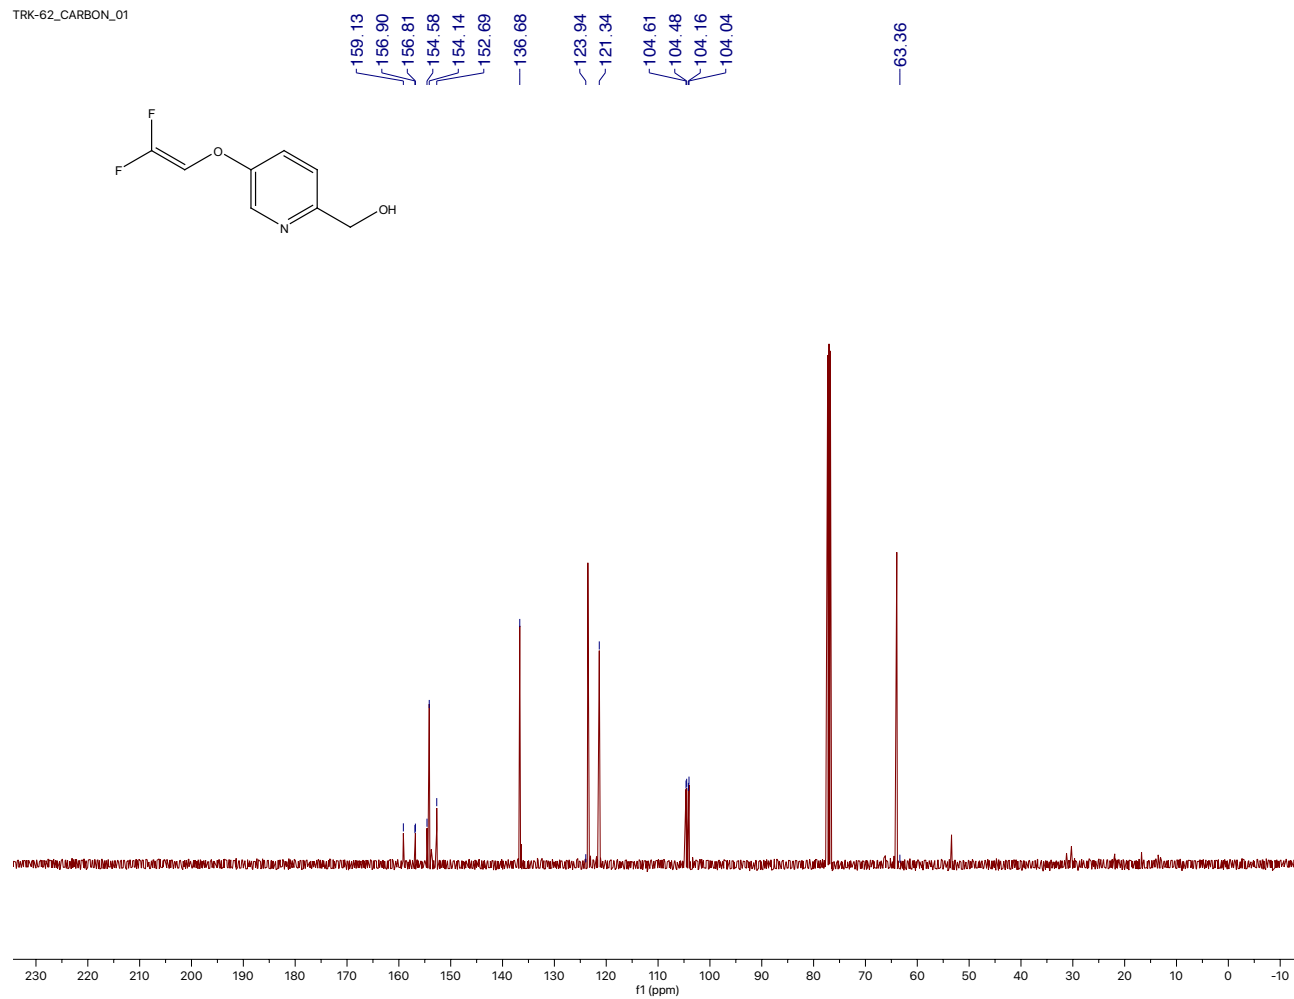Supplemental Figure 33:  $^{13}\text{C}$  NMR of 4

TRK-62\_FLUORINE\_01

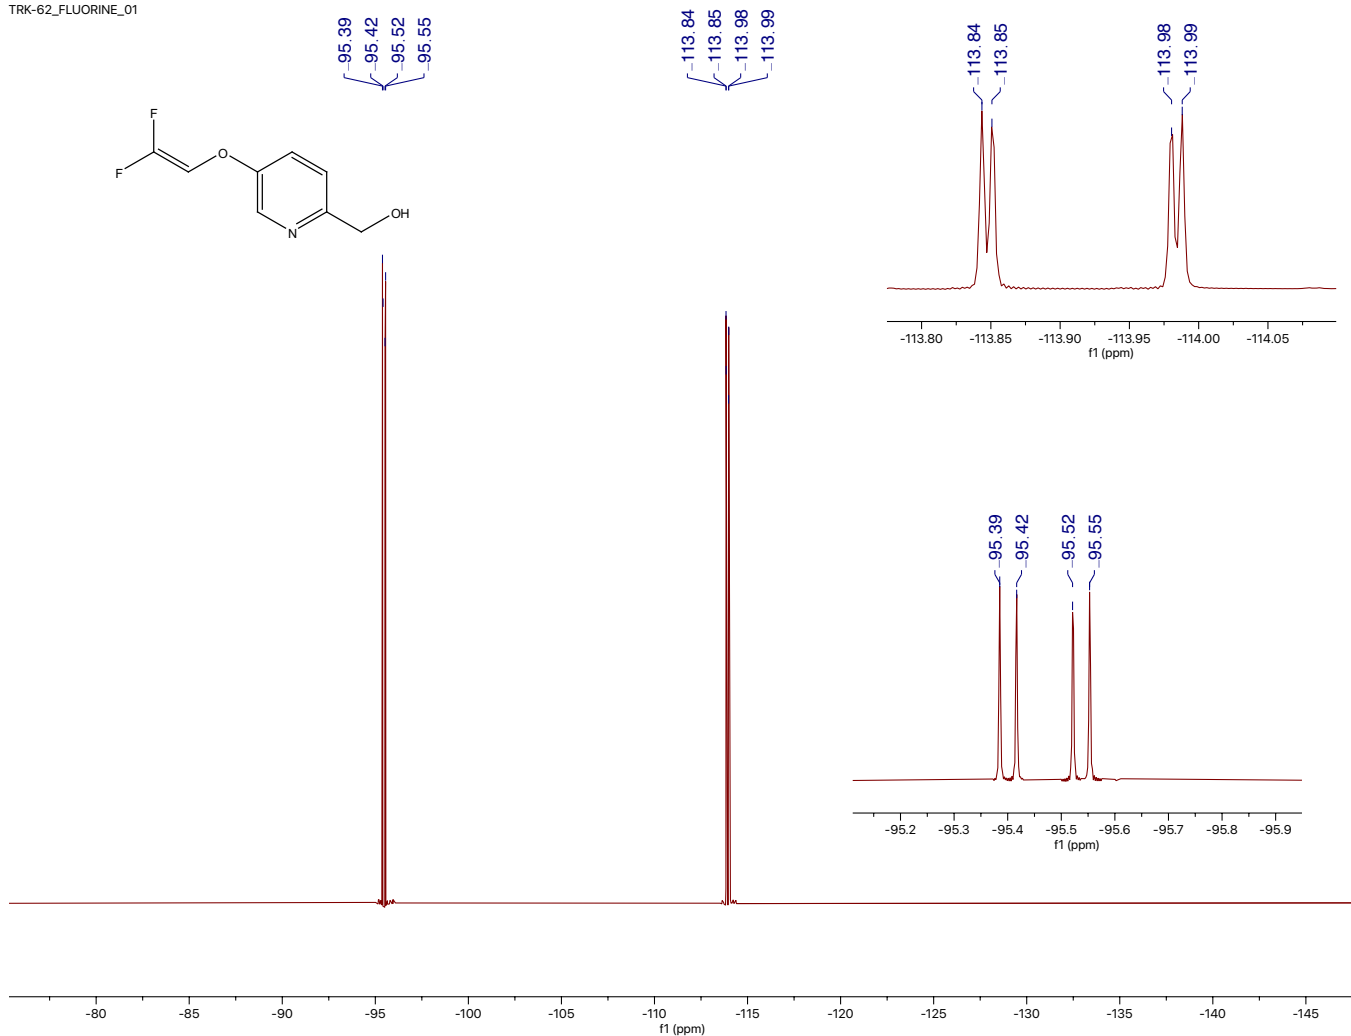

Supplemental Figure 34:  $^{19}\text{F}$  NMR of 4

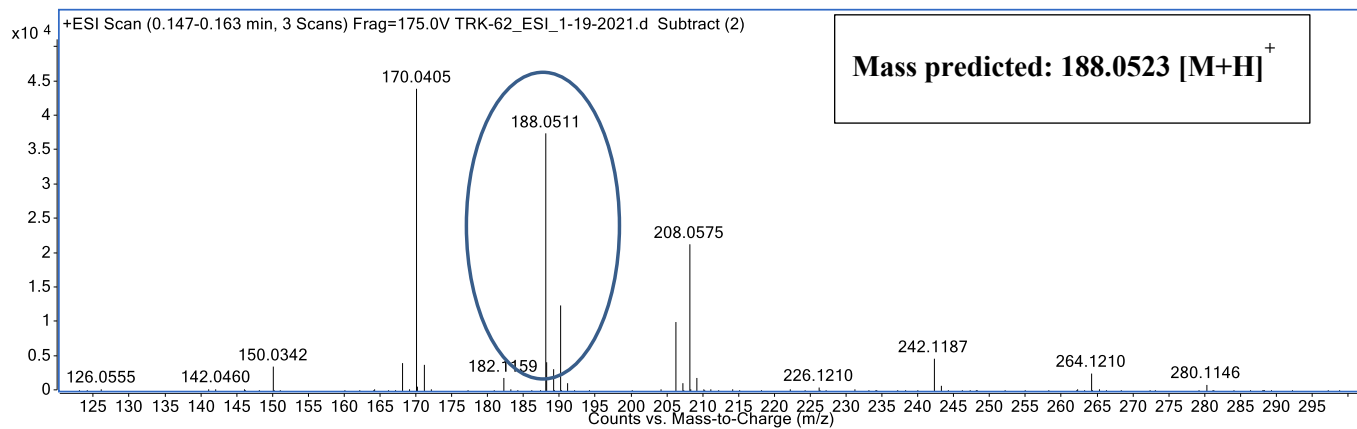

Supplemental Figure 35: HRMS of 4

## 3.7.5-((5-((2,2-Difluorovinyl)oxy)pyridin-2-yl)methoxy)-2-methylbenzo[d]oxazole (6):

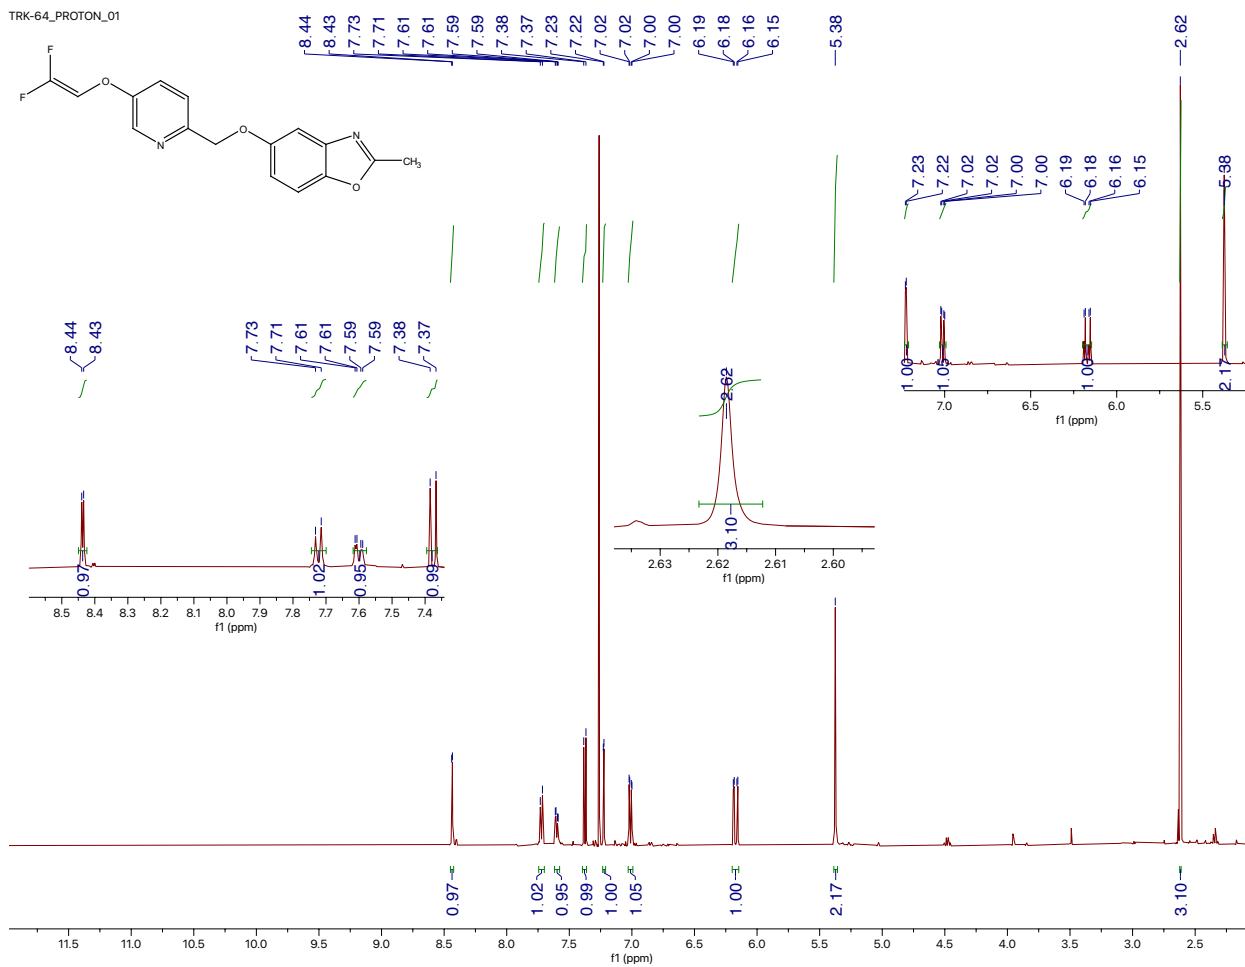Supplemental Figure 36: <sup>1</sup>H NMR of 6

TRK-64\_FLUORINE\_01

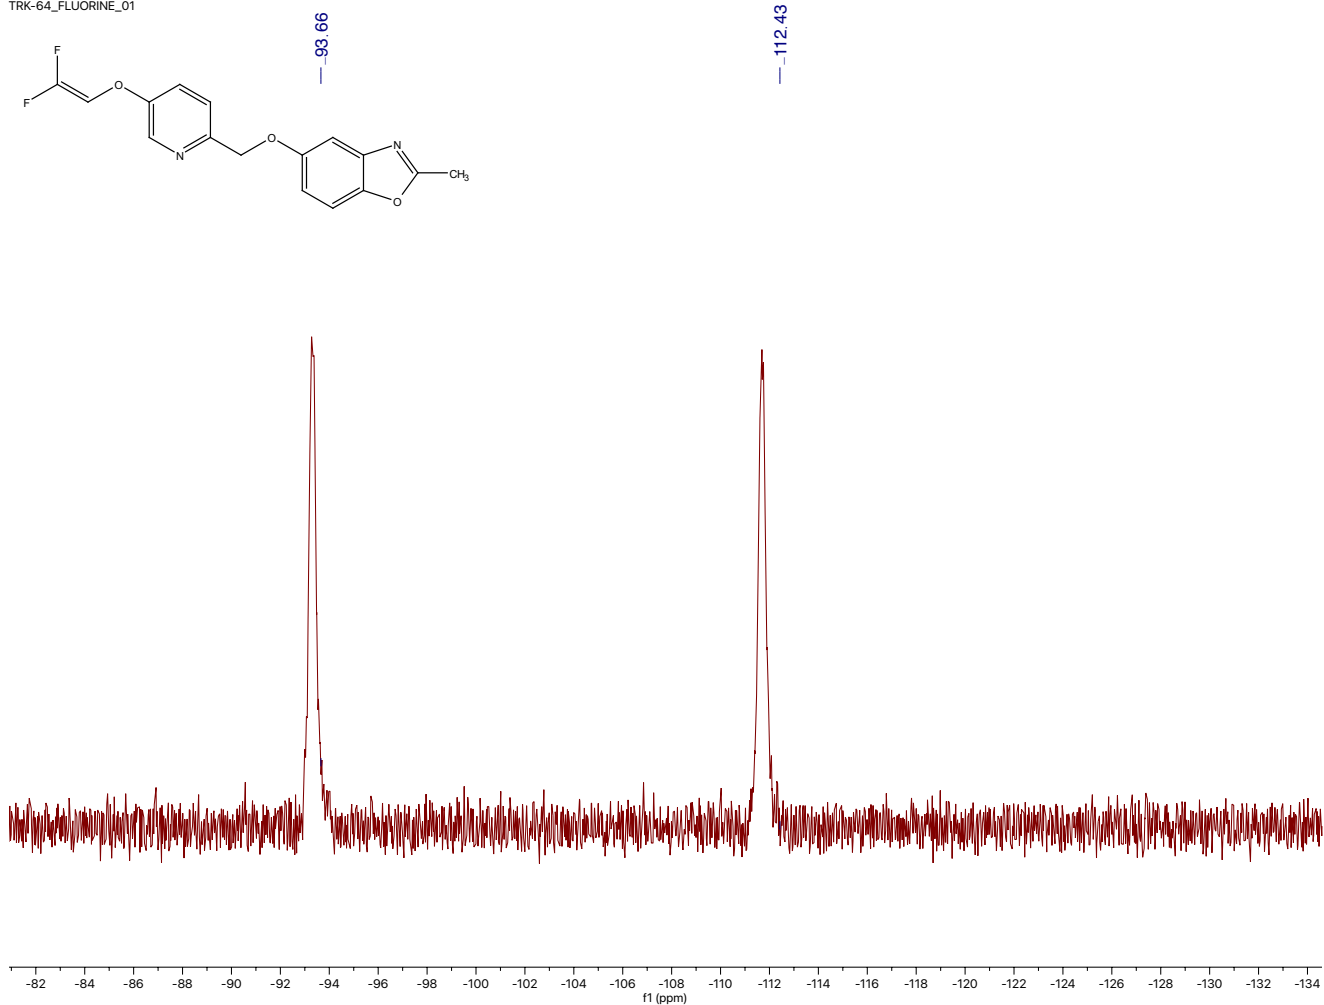

Supplemental Figure 37:  $^{19}\text{F}$  NMR of 6

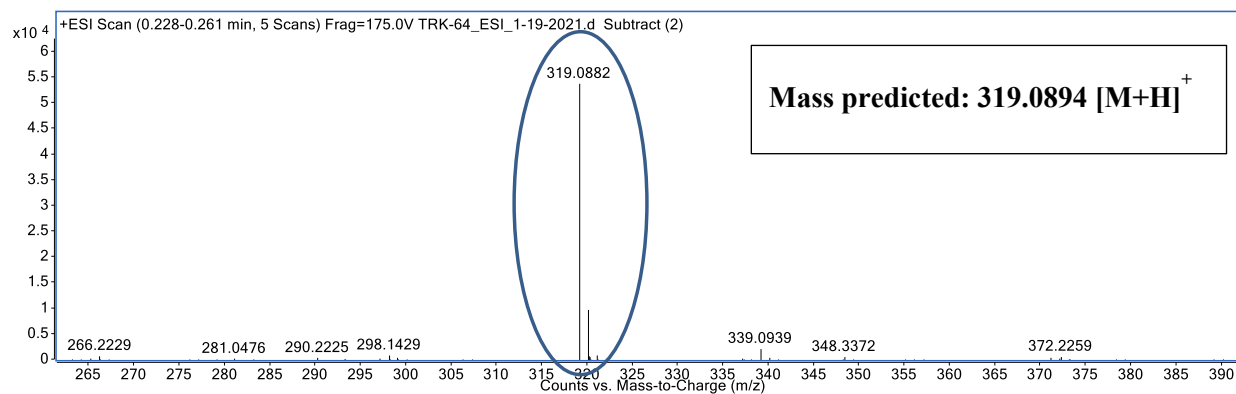

Supplemental Figure 38: HRMS of 6

### 3.8. 2-Amino-4-((5-((2,2-difluorovinyl)oxy)pyridin-2-yl)methoxy)phenol (8):

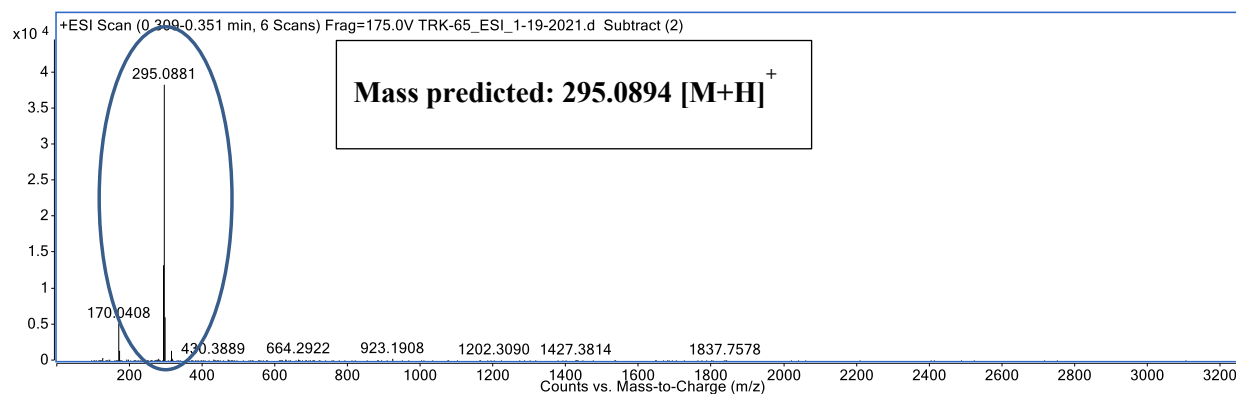

Supplemental Figure 39: HRMS of 8

### 3.9. N-(5-((5-((2,2-difluorovinyl)oxy)pyridin-2-yl)methoxy)-2-hydroxyphenyl)-1-methyl-6-oxo-1,6-dihydropyridazine-3-carboxamide (10):

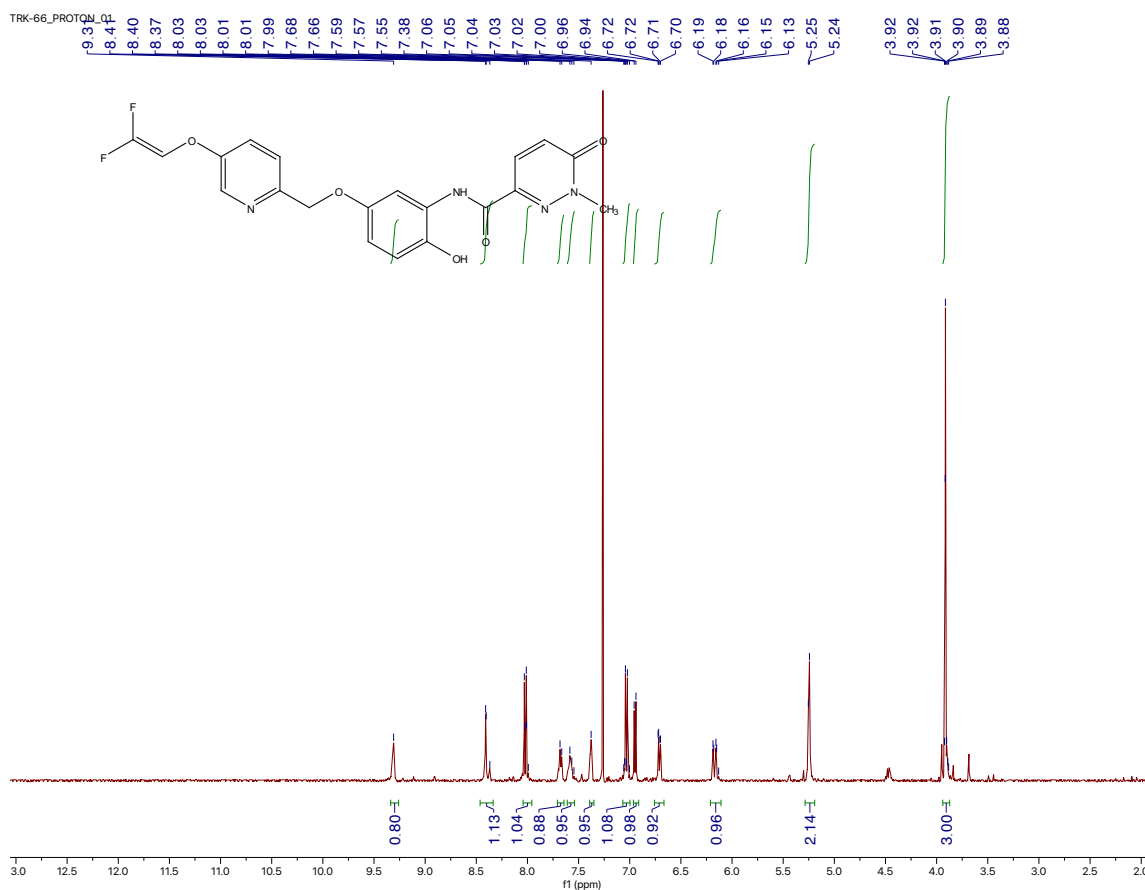

Supplemental Figure 40: <sup>1</sup>H NMR of 10

TRK-66\_FLUORINE\_01

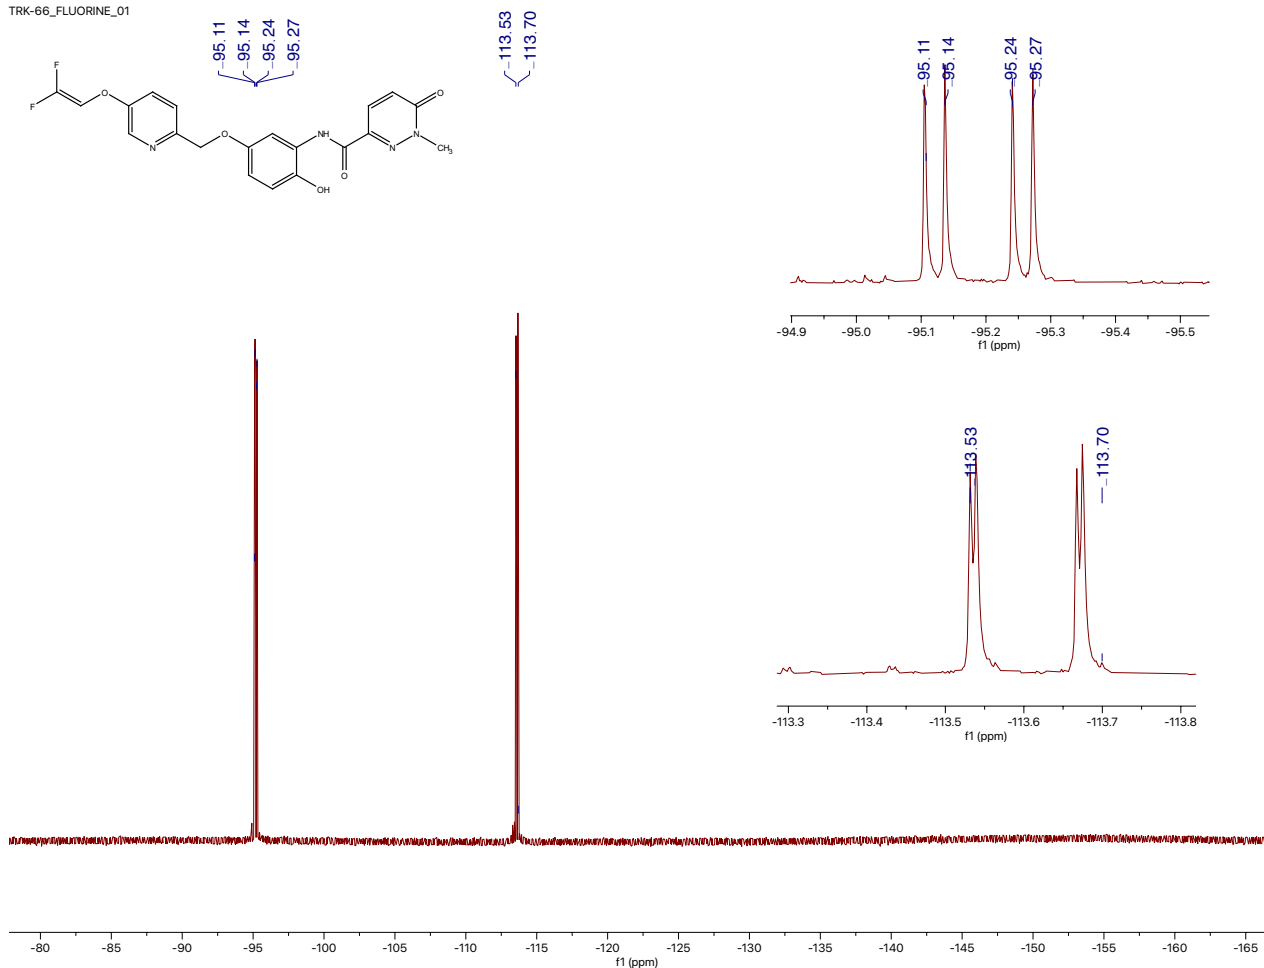

Supplemental Figure 41:  $^{19}\text{F}$  NMR of 10

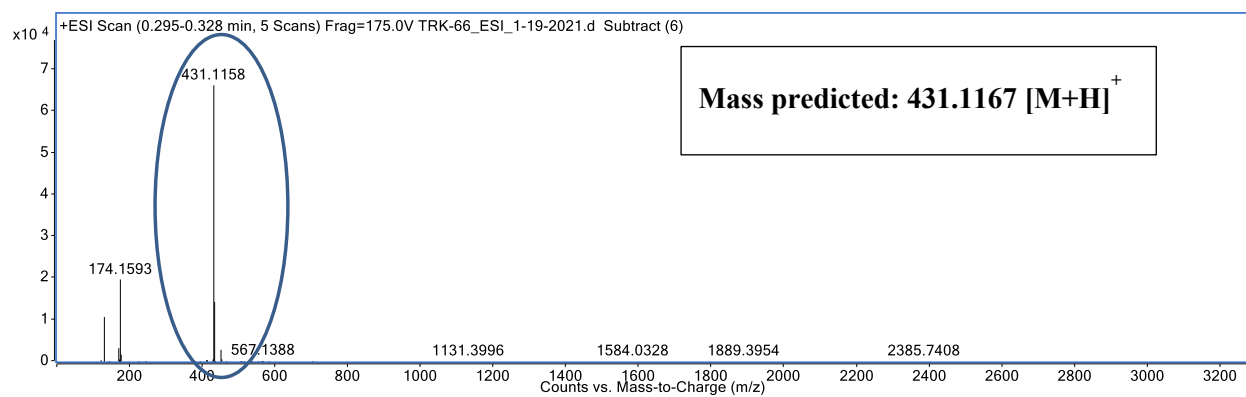

Supplemental Figure 42: HRMS of 10

**3.10. 6-(5-((5-((2,2-Difluorovinyl)oxy)pyridin-2-yl)methoxy)benzo[d]oxazol-2-yl)-2-methyl pyridazin-3(2H)-one (11):**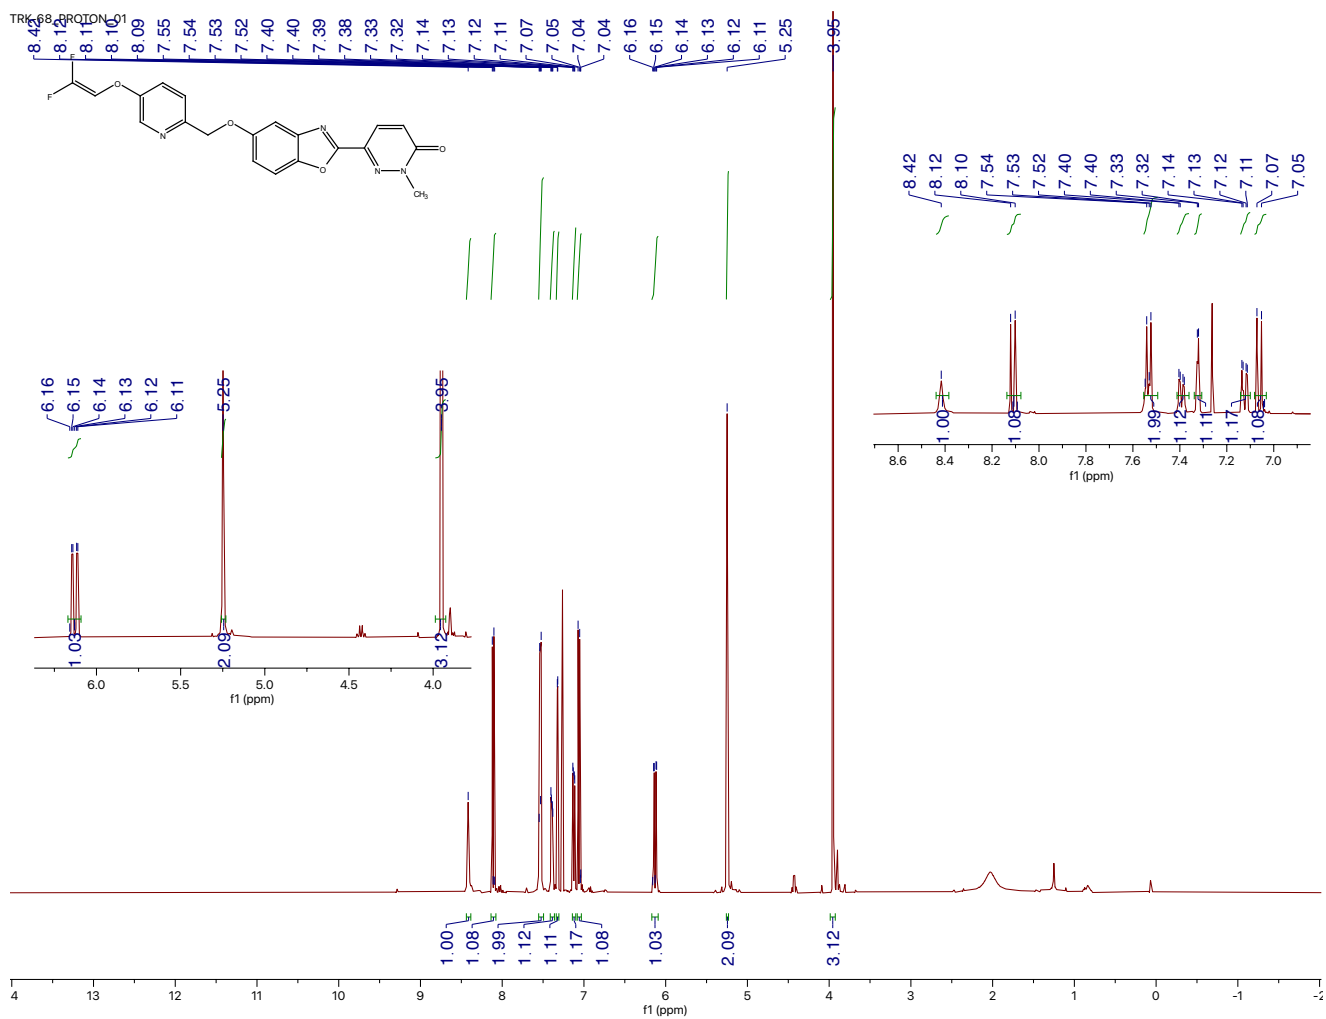Supplemental Figure 43: <sup>1</sup>H NMR of 11





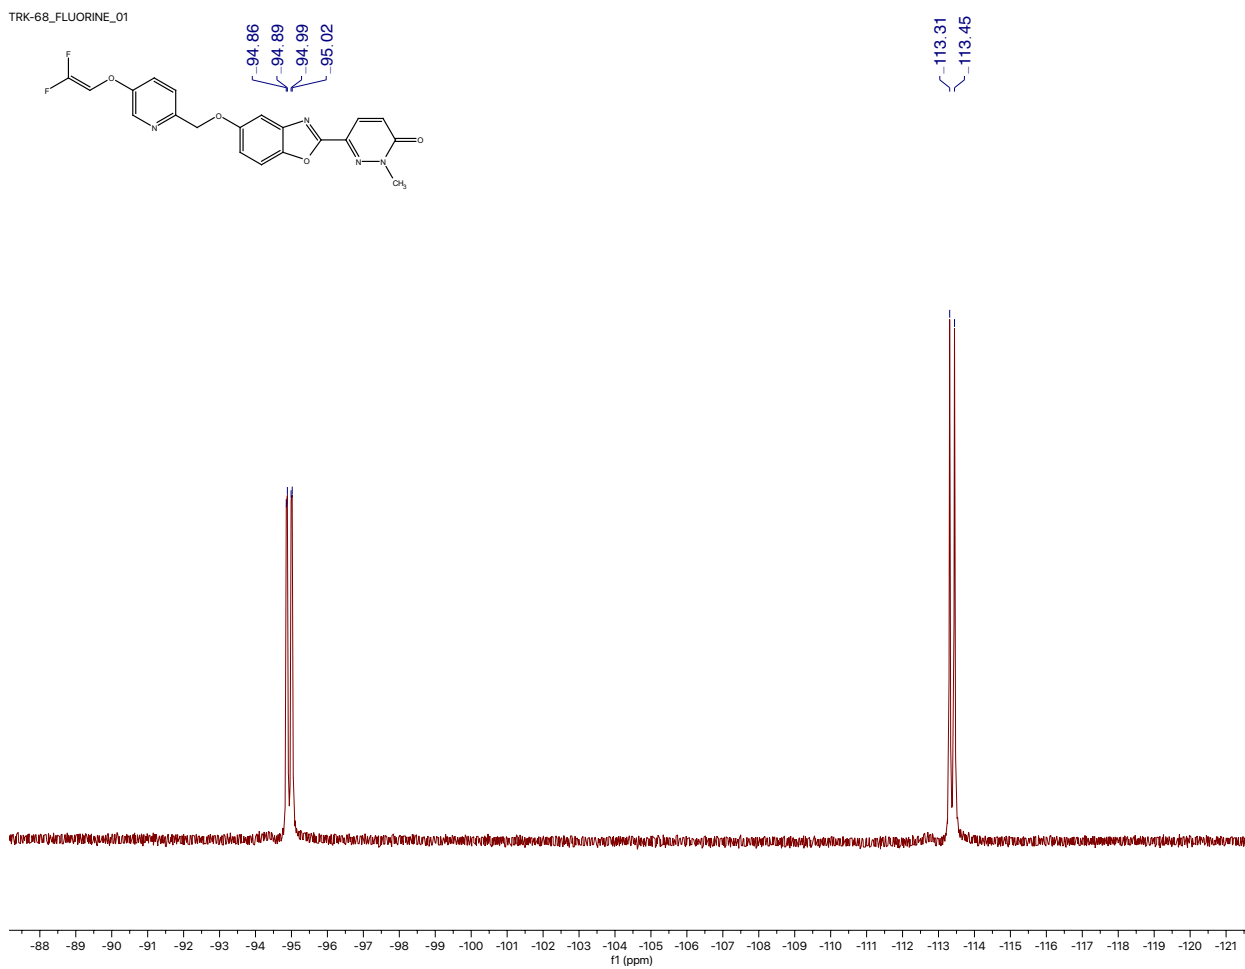Supplemental Figure 45:  $^{19}\text{F}$  NMR of 11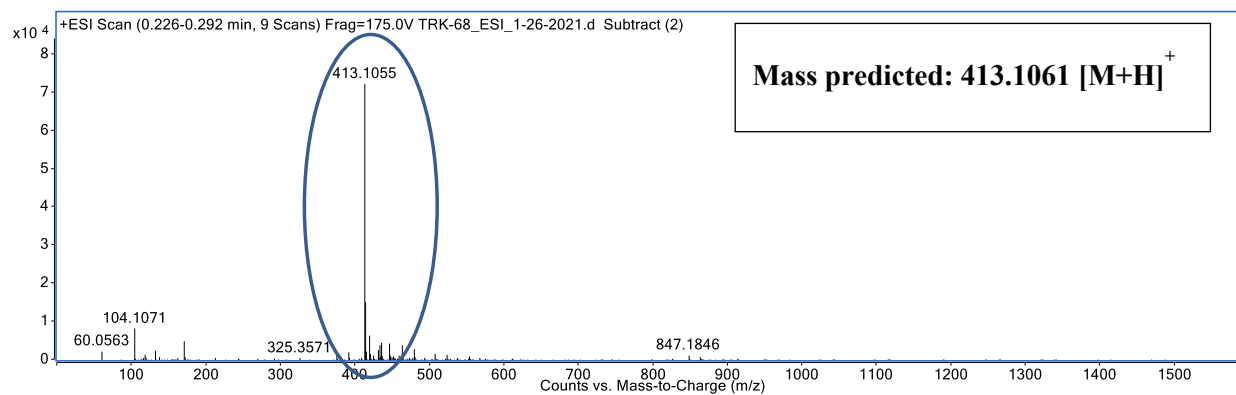

Supplemental Figure 46: HRMS of 11
